# Supplementary material
Source: PubMed Central journal article supplement (PMC6003484)
Supplement: pnas.1721559115.sapp.pdf [file pnas.1721559115.sapp.pdf]

# Supporting Information

Lai et al.

## SI text

### Experimental Results

#### Details of the mouse experiments of Fig. 3(a):

Four to six week old immune competent Balb/c mice were injected subcutaneously in the mammary fat pad with  $1 \times 10^6$  EMT6-HER2 murine mammary carcinoma cells. Mice were administered (1) vehicle, (2) BETi (PLX 51107) (20 mg/kg daily), via oral gavage, (3) anti-CTLA-4 antibody from Bio X Cell (clone 9H10) at 100  $\mu$ g by twice weekly intraperitoneal injection or (4) the combination of BETi and anti-CTLA-4 antibody. Treatment started once tumor diameters reached 5 mm (approximately 7-10 days after tumor injection). Ten to eleven mice were included in each treatment group. Tumor volumes were measured three times weekly with digital calipers. Tumor volume was estimated by the following equation: Tumor volume =  $0.5 \times [(larger\ diameter) \times (smaller\ diameter)^2]$ . Values are the mean  $\bar{A} \pm SE$  of tumor volumes at each time point.

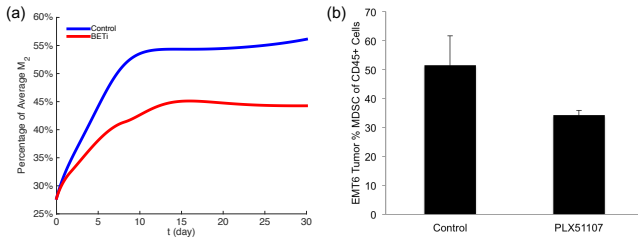

**Fig. S1. Percentage of MDSC in CD45<sup>+</sup> Cells decreases under the treatment of BETi.** (a) Numerical simulation results of BETi treatment with  $\gamma_B = 1 \times 10^{-9}$  g/cm<sup>3</sup> · day. (b) EMT6 tumors were generated in Balb/c mice as described in Fig. S1A above and mice were treated with vehicle control or PLX 51107. Tumors were harvested at day 20, processed into single-cell suspensions and stained with Alexa 488 anti-GR-1 and APC anti-CD11b antibodies (BD Biosciences) to measure MDSC. Data were acquired using an LSRII flow cytometer and are expressed as percent of CD45<sup>+</sup> cells.

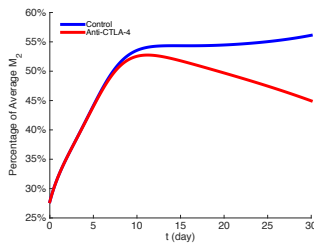

**Fig. S2. Percentage of MDSC in CD45<sup>+</sup> Cells decreases under the treatment of anti-CTLA-4.** Numerical simulation results of anti-CTLA-4 treatment with  $\gamma_A = 0.9 \times 10^{-9}$  g/cm<sup>3</sup> · day.

### Equation for DCs ( $D$ )

By necrotic cancer cells ( $N_C$ ) we mean cancer cells undergoing the process of necrosis. Necrotic cancer cells release HMGB-1 (1). We model the dynamics of the necrotic cells ( $N_C$ ) and

HMGB-1 ( $H$ ) by the following equations:

$$\begin{aligned} \frac{\partial N_C}{\partial t} + \underbrace{\nabla \cdot (\mathbf{u}N_C)}_{\text{velocity}} - \underbrace{\delta_{N_C} \nabla^2 N_C}_{\text{diffusion}} &= \underbrace{\lambda_{N_C C} C}_{\text{derived from life cancer cells}} - \underbrace{d_{N_C} N_C}_{\text{removal}}, \\ \frac{\partial H}{\partial t} - \underbrace{\delta_H \nabla^2 H}_{\text{diffusion}} &= \underbrace{\lambda_{H N_C} N_C}_{\text{released from necrotic cancer cells}} - \underbrace{d_H H}_{\text{degradation}} \end{aligned}$$

where  $\lambda_{N_C C}$  is the rate at which cancer cells become necrotic and  $\lambda_{H N_C}$  is the rate at which necrotic cells produce HMGB-1. We note that although molecules like HMGB-1, or other proteins, may be affected by the velocity  $\mathbf{u}$ , their diffusion coefficients are several order of magnitude larger than the diffusion coefficients of cells, hence their velocity term may be neglected. The degradation of HMGB-1 is fast ( $\sim 0.01/\text{day}$ ) (2), and we assume that the process of necrosis is also fast. We may then approximate the two dynamical equations by the steady state equations  $\lambda_{N_C C} C - d_{N_C} N_C = 0$  and  $\lambda_{H N_C} N_C - d_H H = 0$ , so that  $H$  is proportional to  $C$ .

Dendritic cells are activated by HMGB-1 (3, 4). Hence, the activation rate of immature dendritic cells, with density  $D_0$ , is proportional to  $D_0 \frac{H}{K_H + H}$ , or to  $D_0 \frac{C}{K_C + C}$ , since  $H$  is proportional to  $C$ . Here, the Michaelis-Menten law is used to account for the limited rate of receptor recycling time which takes place in the process of DCs activation. Hence, the dynamics of DCs is given by

$$\frac{\partial D}{\partial t} + \underbrace{\nabla \cdot (\mathbf{u}D)}_{\text{velocity}} - \underbrace{\delta_D \nabla^2 D}_{\text{diffusion}} = \underbrace{\lambda_{DC} D_0 \frac{C}{K_C + C}}_{\text{activation by HMGB-1}} - \underbrace{d_D D}_{\text{death}},$$

where  $\delta_D$  is the diffusion coefficient and  $d_D$  is the death rate of DCs.

### Equations for cytokines

**Equation for IL-12 ( $I_{12}$ ).** The proinflammatory cytokine IL-12 is secreted by activated DCs (5, 6) and by M1 macrophages (7), so that

$$\frac{\partial I_{12}}{\partial t} - \delta_{I_{12}} \nabla^2 I_{12} = \underbrace{\lambda_{I_{12} D} D + \lambda_{I_{12} M_1} M_1}_{\text{production by DCs and M1}} - \underbrace{d_{I_{12}} I_{12}}_{\text{degradation}}. \quad [S1]$$

**Equation for IL-2 ( $I_2$ ).** IL-2 is produced by activated CD4<sup>+</sup> T cells ( $T_1$ ) (6). Hence,

$$\frac{\partial I_2}{\partial t} - \delta_{I_2} \nabla^2 I_2 = \underbrace{\lambda_{I_2 T_1} T_1}_{\text{production by } T_1} - \underbrace{d_{I_2} I_2}_{\text{degradation}}. \quad [S2]$$

**Equation for TGF- $\beta$  ( $T_\beta$ ).** TGF- $\beta$  is produced by tumor cells (8), Tregs (9) and M2 macrophages (10–12):

$$\frac{\partial T_\beta}{\partial t} - \delta_{T_\beta} \nabla^2 T_\beta = \underbrace{\lambda_{T_\beta C} C + \lambda_{T_\beta T_r} T_r + \lambda_{T_\beta M_2} M_2}_{\text{production by cancer, Tregs and M2}} - \underbrace{d_{T_\beta} T_\beta}_{\text{degradation}}. \quad [S3]$$

**Equation for IL-10 ( $I_{10}$ ).** IL-10 is produced by cancer cells and by M2 macrophages (8). Hence  $I_{10}$  satisfies the following equation:

$$\frac{\partial I_{10}}{\partial t} - \delta_{I_{10}} \nabla^2 I_{10} = \underbrace{\lambda_{I_{10}C} C + \lambda_{I_{10}M_2} M_2}_{\text{production by cancer and M2}} - \underbrace{d_{I_{10}} I_{10}}_{\text{degradation}}. \quad [S4]$$

**Equation for TNF- $\alpha$  ( $T_\alpha$ ).** TNF- $\alpha$  is produced by primarily M1 macrophages and BETi reduces the production of TNF- $\alpha$  by the macrophages (13). TNF- $\alpha$  is also produced by Th1 cells (14, 15). Hence

$$\begin{aligned} \frac{\partial T_\alpha}{\partial t} - \delta_{T_\alpha} \nabla^2 T_\alpha = & \underbrace{\lambda_{T_\alpha M_1} M_1}_{\text{production by M1}} \cdot \underbrace{\frac{1}{1 + B/K_{T_\alpha B}}}_{\text{inhibited by BETi}} \\ & + \underbrace{\lambda_{T_\alpha T_1} T_1}_{\text{production by Th1}} - \underbrace{d_{T_\alpha} T_\alpha}_{\text{degradation}}. \end{aligned} \quad [S5]$$

**Equation for NO ( $N$ ).** NO is produced by M2 macrophages (16, 17), so that

$$\frac{\partial N}{\partial t} - \delta_N \nabla^2 N = \underbrace{\lambda_{NM_2} M_2}_{\text{production by M2}} - \underbrace{d_N N}_{\text{degradation}}. \quad [S6]$$

**Equation for oxygen ( $W$ ).** Oxygen is infused through blood (18, 19). We identify the blood concentration with the density of endothelial cells. Accordingly,

$$\frac{\partial W}{\partial t} - \delta_W \nabla^2 W = \underbrace{\lambda_{WE} E}_{\text{source from blood}} - \underbrace{d_W W}_{\text{consumed by cells}}, \quad [S7]$$

where  $d_W W$  represents the take-up rate of oxygen by all the cells.

**Equation for VEGF ( $G$ ).** VEGF is produced by cancer cells (18, 19) and M2 macrophages (7, 19). BETi treatment down-regulates the hypoxic transcriptome response of cancer cells including VEGF-A (20, 21). Hence the equation for  $G$  is given by

$$\frac{\partial G}{\partial t} - \delta_G \nabla^2 G = \lambda_{GC} C \underbrace{\frac{1}{1 + B/K_{GB}}}_{\text{inhibited by BETi}} + \underbrace{\lambda_{GM_2} M_2}_{\text{production by M2}} - \underbrace{d_G G}_{\text{degradation}}. \quad [S8]$$

**Equation for M-CSF ( $M_C$ ).** M-CSF is produced by cancer cells (22), so that

$$\frac{\partial M_C}{\partial t} - \delta_{M_C} \nabla^2 M_C = \underbrace{\lambda_{M_C C} C}_{\text{production by cancer}} - \underbrace{d_{M_C} M_C}_{\text{degradation}}. \quad [S9]$$

**Equation for MCP-1 ( $M_P$ ).** MCP-1 is produced by cancer cells and by M2 macrophages under inducement by M-CSF (11, 22), so that

$$\frac{\partial M_P}{\partial t} - \delta_{M_P} \nabla^2 M_P = \underbrace{\lambda_{M_P C} C + \lambda_{M_P M_2} M_2 \frac{M_C}{K_{M_C + M_C}}}_{\text{production by cancer and M2}} - \underbrace{d_{M_P} M_P}_{\text{degradation}}. \quad [S10]$$

**Equation for CTLA-4 ( $P$ ), B7 ( $L$ ) and CTLA-4-B7 ( $Q$ ).**

CTLA-4 is a ligand expressed on CD4<sup>+</sup> T cells and CD8<sup>+</sup> T cells; its receptor B7 is on dendritic cells. The complex CTLA-4-B7 blocks the activity of T cells. We assume that the number of CTLA-4 per cell is the same for  $T_1$  and  $T_8$  cells. If we denote by  $\rho_P$  the ratio between the mass of one CTLA-4 protein to the mass of one T cell, then

$$P = \rho_P (T_1 + T_8), \quad \rho_P = \text{constant},$$

we conclude that  $P$  satisfies the equation

$$\begin{aligned} \frac{\partial P}{\partial t} + \nabla \cdot (\mathbf{u}P) - \delta_T \nabla^2 P = & \rho_P \left[ \frac{\partial (T_1 + T_8)}{\partial t} + \nabla \cdot (\mathbf{u}(T_1 + T_8)) \right. \\ & \left. - \delta_T \nabla^2 (T_1 + T_8) \right], \end{aligned}$$

or,

$$\begin{aligned} & \frac{\partial P}{\partial t} + \nabla \cdot (\mathbf{u}P) - \delta_T \nabla^2 P \\ = & \frac{P}{T_1 + T_8} \left[ \frac{(\lambda_{T_1 I_{12}} T_{10} + \lambda_{T_8 I_{12}} T_{80}) I_{12}}{(K_{I_{12}} + I_{12})(1 + I_{10}/K_{T I_{10}})(1 + T_r/K_{T T_r})} \right. \\ & \left. + (\lambda_{T_1 I_2} T_1 + \lambda_{T_8 I_2} T_8) \frac{I_2}{K_{I_2} + I_2} \right] \times \frac{1 + \varepsilon_{TB}}{1 + Q/K_{TQ}} \\ & - \rho_P (d_{T_1} T_1 + d_{T_8} T_8), \end{aligned}$$

where  $Q$  is the density of the complex CTLA-4-B7, and  $\rho_P = \frac{P}{T_1 + T_8}$ . When anti-CTLA-4 drug ( $A$ ) is applied, CTLA-4 is depleted by  $A$ . Hence,

$$\begin{aligned} & \frac{\partial P}{\partial t} + \nabla \cdot (\mathbf{u}P) - \delta_T \nabla^2 P \\ = & \frac{P}{T_1 + T_8} \left[ \frac{(\lambda_{T_1 I_{12}} T_{10} + \lambda_{T_8 I_{12}} T_{80}) I_{12}}{(K_{I_{12}} + I_{12})(1 + I_{10}/K_{T I_{10}})(1 + T_r/K_{T T_r})} \right. \\ & \left. + (\lambda_{T_1 I_2} T_1 + \lambda_{T_8 I_2} T_8) \frac{I_2}{K_{I_2} + I_2} \right] \times \frac{1 + \varepsilon_{TB}}{1 + Q/K_{TQ}} \\ & - \frac{P}{T_1 + T_8} (d_{T_1} T_1 + d_{T_8} T_8) - \underbrace{\mu_{PA} P}_{\text{depletion by anti-CTLA-4}}. \end{aligned} \quad [S11]$$

The ligand B7 is expressed on dendritic cells, and we take

$$L = \rho_L D, \quad \rho_L = \text{constant}. \quad [S12]$$

CTLA-4 and B7 form the complex CTLA-4-B7 ( $Q$ ) with association and disassociation rates  $\alpha_{PL}$  and  $d_Q$ , respectively:

$$P + L \xrightleftharpoons[\alpha_{PL}]{d_Q} Q. \quad [S13]$$

We assume that the half-life of  $Q$  is very short (23, 24), so that the dynamics in Eq. (S13) is in a quasi-steady state. Hence  $\alpha_{PL} P L = d_Q Q$ , or

$$Q = \sigma P L, \quad [S14]$$

where  $\sigma = \alpha_{PL}/d_Q$ .

**Equation for cells velocity ( $\mathbf{u}$ ).** We assume that the densities of cell in the growing tumor tend to steady state, and take the density of cancer cells in steady state to be  $3.40/\text{cm}^3$ . We also assume that most of the macrophages are "tumor associated macrophages" (TAM), which we identify as M2 macrophages. We accordingly take, in steady state, the density of M2 and M1 macrophages to be  $M_2 = 3.2 \times 10^{-3} \text{ g/cm}^3$  and  $M_1 = 10^{-4} \text{ g/cm}^3$ .

We take the steady state density of endothelial cells to be  $E = 2.5 \times 10^{-3} \text{ g/cm}^3$  (25), and as estimated in the parameter estimation section, the steady state densities of the immune cells  $D$ ,  $T_1$ ,  $T_8$  and  $T_r$  to be (in unit of  $\text{g/cm}^3$ )

$$\begin{aligned} D = 4 \times 10^{-4}, \quad T_1 = 2 \times 10^{-3}, \quad T_8 = 1 \times 10^{-3}, \\ T_r = 5 \times 10^{-4}, \quad M_1 = 1 \times 10^{-3}, \quad M_2 = 3.2 \times 10^{-3}, \end{aligned} \quad [S15]$$

respectively. We assume that all cells have approximately the same volume and surface area, so that the diffusion coefficients

of all the cells are the same. Adding the equations of all the cells, we get

$$0.4097 \times \nabla \cdot \mathbf{u} = \sum_{j=2}^9 [\text{right-hand side of Eq. } j], \quad [\text{S16}]$$

where the constant 0.4097 follows from Eq. 1.

**Boundary conditions** We assume that the naive CD4<sup>+</sup> T cells and inactive CD8<sup>+</sup> T cells that migrated from the lymph nodes into the tumor microenvironment have constant densities  $\hat{T}_1$  and  $\hat{T}_8$  at the tumor boundary, and that  $T_1$  and  $T_8$  are activated by IL-12 upon entering the tumor. We then have the following flux conditions at the tumor boundary:

$$\begin{aligned} \frac{\partial T_1}{\partial r} + \sigma_T(I_{12})(T_1 - \hat{T}_1) &= 0, \quad \frac{\partial T_8}{\partial r} + \sigma_T(I_{12})(T_8 - \hat{T}_8) = 0, \\ \frac{\partial T_r}{\partial r} + \sigma_{T_r}(T_\beta)(T_r - \hat{T}_r) &= 0, \quad \text{at } r = R(t), \end{aligned} \quad [\text{S17}]$$

where we take  $\sigma_T(I_{12}) = \sigma_0 \frac{I_{12}}{I_{12} + K_{I_{12}}}$  and  $\sigma_{T_r}(T_\beta) = \sigma_0 \frac{T_\beta}{T_\beta + K_{T_\beta}}$ .

We impose a no-flux boundary condition for all the remaining variables:

$$\begin{aligned} \text{No-flux for } D, M_1, M_2, E, C, I_{12}, I_2, T_\beta, I_{10}, T_\alpha, \\ N, W, G, M_C, M_P, L, A, \text{ and } B \text{ at } r = R(t). \end{aligned} \quad [\text{S18}]$$

It is tacitly assumed here that the receptors PD-1 and ligands PD-L1 become active only after the T cells are already inside the tumor.

## Parameter estimation

**Half-saturation.** In an expression of the form  $Y \frac{X}{K_X + X}$  where  $Y$  is activated by  $X$ , the half-saturation parameter  $K_X$  is taken to be the approximate steady state concentration of species  $X$ .

**Diffusion coefficients.** By (26), we have the following relation for estimating the diffusion coefficients of a protein  $p$ :

$$\delta_p = \frac{M_G^{1/3}}{M_p^{1/3}} \delta_G,$$

where  $M_G$  and  $\delta_G$  are respectively the molecular weight and diffusion coefficient of VEGF,  $M_p$  is the molecular weight of  $p$ , and  $M_G = 24\text{kDa}$  (27) and  $\delta_G = 8.64 \times 10^{-2} \text{ cm}^2 \text{ day}^{-1}$  (28). Since,  $M_{I_2} = 17.6\text{kDa}$  (29),  $M_{I_{12}} = 70\text{kDa}$  (30),  $M_{T_\beta} = 25\text{kDa}$  (31),  $M_{I_{10}} = 20.5\text{kDa}$  (32),  $M_{T_\alpha} = 25.6\text{kDa}$  (33),  $M_{M_C} = 60.2\text{kDa}$  (34),  $M_{M_P} = 11\text{kDa}$  (35),  $M_A = 146.3\text{kDa}$  (Durvalumab) (36) and  $M_B = 457\text{Da}$  (JQ1) (37), we get  $\delta_{I_2} = 9.58 \times 10^{-2} \text{ cm}^2 \text{ day}^{-1}$ ,  $\delta_{I_{12}} = 6.05 \times 10^{-2} \text{ cm}^2 \text{ day}^{-1}$ ,  $\delta_{T_\beta} = 8.52 \times 10^{-2} \text{ cm}^2 \text{ day}^{-1}$ ,  $\delta_{I_{10}} = 9.11 \times 10^{-2} \text{ cm}^2 \text{ day}^{-1}$ ,  $\delta_{T_\alpha} = 8.46 \times 10^{-2} \text{ cm}^2 \text{ day}^{-1}$ ,  $\delta_{M_C} = 6.36 \times 10^{-2} \text{ cm}^2 \text{ day}^{-1}$ ,  $\delta_{M_P} = 1.12 \times 10^{-1} \text{ cm}^2 \text{ day}^{-1}$ ,  $\delta_A = 4.73 \times 10^{-2} \text{ cm}^2 \text{ day}^{-1}$  and  $\delta_B = 3.24 \times 10^{-1} \text{ cm}^2 \text{ day}^{-1}$ .

**Eq. 2.** The number of DCs in various organs (heart, kidney, pancreas and liver) in mouse varies from  $1.1 \times 10^6$  cells/cm<sup>3</sup> to  $6.6 \times 10^6$  cells/cm<sup>3</sup> (38). In the dermal tissue, the number of DCs is larger (600-1500 cells/mm<sup>2</sup>) (39, 40), but we do not specify where the melanoma cancer is located; it may

be at its initial dermal tissue or in another organ where it metastasized. Mature DCs are approximately 10 to 15  $\mu\text{m}$  in diameter (41). Accordingly, we estimate the steady state of DCs to be  $K_D = 4 \times 10^{-4} \text{ g/cm}^3$ . We assume that there are always immature dendritic cells, some coming from the blood as tumor infiltrating dendritic cells (TID) (5, 6, 42). We also assume that the density of immature DCs to be smaller than the density of active DCs, and take  $D_0 = \frac{1}{20} K_D = 2 \times 10^{-5} \text{ g/cm}^3$ .

If we use, as the steady state equation of Eq. 2, the relation  $\lambda_{DC} D_0 \frac{C}{K_C + C} = d_D D$ , where,  $d_D = 0.1/\text{day}$  (43),  $C = K_C = 0.4 \text{ g/cm}^3$ ,  $D = K_D = 4 \times 10^{-4} \text{ g/cm}^3$ ,  $D_0 = 2 \times 10^{-5} \text{ g/cm}^3$ , we get  $\lambda_{DC} = 2d_D D/D_0 = 4/\text{day}$ . We note however that in estimating  $\lambda_{DC}$ , we ignored the contribution of  $\nabla \cdot (\mathbf{u}D)$ , whose integral over the tumor  $\{r < R(t)\}$  is  $\int_{r=R(t)} \frac{dR(t)}{dt} \cdot D$ , which is a positive quantity. Hence,  $\frac{\partial D}{\partial t}$  is actually decreased when we equate to zero the right-hand side (RHS) of Eq. 2; we therefore need to increase  $\lambda_{DC}$ ; we take  $\lambda_{DC} = 10/\text{day}$ .

**Eqs. 3 and 4.** The number of lymphocytes is approximately twice the number of DCs (38). T cells are approximately 5 to 10  $\mu\text{m}$  in diameter. Assuming that the number of Th1 cells is 1/4 the number of lymphocytes, we estimate steady state density of Th1 cells to be  $K_{T_1} = 2 \times 10^{-3} \text{ g/cm}^3$ . We assume that the density of naive CD4<sup>+</sup> T cells to be less than the density of Th1, and take  $T_{10} = \frac{1}{5} K_T = 4 \times 10^{-4} \text{ g/cm}^3$ . We choose  $K_{T_{T_r}}$  to be half of the half-saturation of  $T_r$ , that is,  $K_{T_{T_r}} = K_{T_r}/2 = 2.5 \times 10^{-4} \text{ g/cm}^3$ , and  $K_{T_{I_{10}}}$  to be half of the half-saturation of  $I_{10}$ , namely,  $K_{T_{I_{10}}} = K_{I_{10}}/2 = 4.375 \times 10^{-11} \text{ g/cm}^3$ . We assume that in steady state,  $Q/K_{T_Q} = 2$  (the value of  $K_{T_Q}$  is derived in the estimates of Eqs. 20-22).

From the steady state of Eq. 2 (more precisely, by setting to zero the RHS of Eq. 2 without BETi, we get

$$\left( \lambda_{T_1 I_{12}} T_{10} \cdot \frac{1}{2} \cdot \frac{1}{3} \cdot \frac{1}{3} + \lambda_{T_1 I_2} T_1 \cdot \frac{1}{2} \right) \cdot \frac{1}{3} - d_{T_1} T_1 = 0,$$

where  $\lambda_{T_1 I_2} = 0.25/\text{day}$  (43),  $d_{T_1} = 0.197/\text{day}$  (43),  $T_{10} = 4 \times 10^{-4} \text{ g/cm}^3$  and  $T_1 = K_{T_1} = 2 \times 10^{-3} \text{ g/cm}^3$ . Hence  $\lambda_{T_1 I_{12}} = 27.96/\text{day}$ .

The CD4/CD8 ratio in the blood is 2:1. We assume a similar ratio in tissue, and take  $T_{80} = \frac{1}{2} T_{10} = 2 \times 10^{-4} \text{ g/cm}^3$ . We also take steady state of  $T_8$  to be the half of steady state of  $T_1$ , i.e.,  $K_{T_8} = \frac{1}{2} K_{T_1} = 1 \times 10^{-3} \text{ g/cm}^3$ .

From the steady state of Eq. 4 (more precisely, by setting to zero the RHS of Eq. 4, we get

$$\left( \lambda_{T_8 I_{12}} T_{80} \cdot \frac{1}{2} \cdot \frac{1}{3} \cdot \frac{1}{3} + \lambda_{T_8 I_2} T_8 \cdot \frac{1}{2} \right) \cdot \frac{1}{3} - d_{T_8} T_8 = 0$$

where  $\lambda_{T_8 I_2} = 0.25/\text{day}$  (43),  $d_{T_8} = 0.18/\text{day}$  (43),  $T_{80} = 2 \times 10^{-4} \text{ g/cm}^3$ ,  $T_8 = K_{T_8} = 1 \times 10^{-3} \text{ g/cm}^3$ . Hence  $\lambda_{T_8 I_{12}} = 24.90/\text{day}$ .

As in the case of Eq.2, we actually need to consider the contribution of  $\nabla \cdot (\mathbf{u}T_1)$  to the steady state assumption, and also the contribution of the flux of T cells at the tumor boundary. Since the flux of T cells is positive on the boundary, we actually get two contributions from the left-hand side (LHS) of Eq. 28, a positive term from  $\nabla \cdot (\mathbf{u}T_1)$  and a negative term from the flux of  $T_1$ . We assume they cancel each other, and retain the above value of  $\lambda_{T_1 I_{12}}$ . The same applies to the cases of  $T_8$ .

**Eq. 5.** From the steady state of Eq. 5 without BETi, we get,  $\lambda_{T_r T_\beta} \cdot \frac{1}{2} T_{10} - d_{T_r} T_r = 0$ , where  $T_{10} = 4 \times 10^{-4} \text{ g/cm}^3$ ,  $T_r = K_{T_r} = 5 \times 10^{-4} \text{ g/cm}^3$  (43), and  $d_{T_r} = 0.2/\text{day}$  (43). Hence  $\lambda_{T_r T_\beta} = 0.5/\text{day}$ . As in the case of Eq. 2, we increase  $\lambda_{T_r T_\beta}$  to  $\lambda_{T_r T_\beta} = 1.5/\text{day}$ .

**Eqs. 6 and 7.** In breast cancer, most of the macrophages are M2 macrophages (7, 44). Accordingly we take  $K_{M_2} = 3.2 \times 10^{-3} \text{ g/cm}^3$  and  $K_{M_1} = 10^{-4} \text{ g/cm}^3$  at half-saturation of  $M_2$  and  $M_1$ , and  $M_{20} = 1.2M_2 = 3.84 \times 10^{-3} \text{ g/cm}^3$  and  $M_{10} = 1.2M_1 = 1.2 \times 10^{-4} \text{ g/cm}^3$ . From steady state of Eqs. 6 and 7 (setting the right hands sides to zero), we get,

$$\frac{1}{2} \lambda_{M_1} (M_{10} - M_1) + \beta_{M_2} M_2 - \beta_{M_1} M_1 = d_{M_1} M_1,$$

and

$$\frac{1}{2} \lambda_{M_2} (M_{20} - M_2) + \beta_{M_1} M_1 - \beta_{M_2} M_2 = d_{M_2} M_2.$$

where  $d_{M_1} = d_{M_2} = 0.015/\text{day}$  (25, 45). We assume that more M1 macrophages convert to M2 macrophages, and that  $\beta_{M_1} M_1 = 2\beta_{M_2} M_2$  and  $\beta_{M_1} M_1 = 10d_{M_1} M_1$  in steady state. Hence  $\beta_{M_1} = 0.15$ ,  $\beta_{M_2} = 2.34 \times 10^{-3}$ ,  $\lambda_{M_1} = 2(d_{M_1} M_1 - \beta_{M_2} M_2 + \beta_{M_1} M_1)/(M_{10} - M_1) = 0.90/\text{day}$ , and  $\lambda_{M_2} = 2(d_{M_2} M_2 + \beta_{M_2} M_2 - \beta_{M_1} M_1)/(M_{20} - M_2) = 0.13/\text{day}$ , in steady state. As in the case of Eq. 2, in the steady state we need to take into account the advection terms  $\nabla \cdot (\mathbf{u}M_1)$  and  $\nabla \cdot (\mathbf{u}M_2)$  and thus increase both  $\lambda_{M_1}$  and  $\lambda_{M_2}$ . Furthermore, since cancer cells are proliferating, the tumor associated macrophages will also increase, which means additional increase of  $\lambda_{M_2}$  and  $\lambda_{M_1}$ . We take  $\lambda_{M_2} = 1.01/\text{day}$  and  $\lambda_{M_1} = 1.35/\text{day}$ .

**Eq. 8.** Setting to zero the RHS of Eq.8 we get,  $\lambda_E E(1 - E/E_M)(G - G_0) - d_E E = 0$ , where  $d_E = 0.69/\text{day}$   $E_M = 5 \times 10^{-3} \text{ g/cm}^3$ ,  $E = K_E = 2.5 \times 10^{-3} \text{ g/cm}^3$ ,  $G = K_G = 7 \times 10^{-8} \text{ g/cm}^3$  (see Eq. S8) and  $G_0 = 3.65 \times 10^{-10} \text{ g/cm}^3$ . Hence,  $\lambda_E = 2d_E/(K_G - G_0) = 1.98 \times 10^7 \text{ cm}^3/\text{g} \cdot \text{day}$ . As in the case of Eq. 2, because of the positive contribution of the average of  $\nabla \cdot (\mathbf{u}E)$  in the steady state, we need to increase  $\lambda_E$ , and we take  $\lambda_E = 2.38 \times 10^7/\text{day}$ .

**Eq. 9.** We take  $d_C = 0.17 \text{ day}^{-1}$ ,  $C_M = 0.8 \text{ g/cm}^3$  (43) and  $\lambda_C = 1.6/\text{day}$  (46). In the steady state of the control case (no anti-tumor drugs), We assume that  $C$  is approximately  $0.4 \text{ g/cm}^3$ , and  $W = K_W = 4.65 \times 10^{-4}$  and  $N = K_N = 2 \times 10^{-6} \text{ g/cm}^3$  (see the estimates of Eqs. S7 and S6) (ignoring the advection term). In the the control case, from the steady state of Eq. 9, we have

$$\lambda_C \cdot \frac{1}{2} \cdot \frac{1}{2} - (\eta_1 T_1 + \eta_8 T_8) \cdot \frac{1}{2} - d_C = 0.$$

Noting that  $T_8$  cells kill cancer cells more effectively than  $T_1$  cells, we take  $\eta_8 = 5\eta_1$ , so that (with  $T_1 = K_{T_1} = 2 \times 10^{-3} \text{ g/cm}^3$  and  $T_8 = K_{T_8} = 1 \times 10^{-3} \text{ g/cm}^3$ ),  $\eta_1 = 2(\lambda_C/4 - d_C)/(T_1 + 5T_8) = 65.71 \text{ cm}^3/\text{g} \cdot \text{day}$  and  $\eta_8 = 328.55 \text{ cm}^3/\text{g} \cdot \text{day}$ . In the control case, including the effect of the advection term and the fact that the tumor grows, we need to increase the growth rate of cancer cells; we take  $\lambda_C = 1.92/\text{day}$ . When BETi drug is applied, we take  $K_{CB} = 10K_B = 8.02 \times 10^{-10} \text{ g/cm}^3$ , by the estimation of  $K_B$  (in Eq. 11).

**Eqs. S1.** The serum level of IL-12 in melanoma patients varies from  $7.5 \times 10^{-11} - 9.6 \times 10^{-11} \text{ g/cm}^3$  (47, 48). We assume that the IL-12 level in tissue is higher, and take  $I_{12} = K_{I_{12}} = 8 \times 10^{-10} \text{ g/cm}^3$ . We assume that the production rate of IL-12 is the same for DCs and M1 macrophages, so that  $\lambda_{I_{12} D} D = \lambda_{I_{12} M_1} M_1$ . From steady state of Eq. (S1), we get  $\lambda_{I_{12} D} D + \lambda_{I_{12} M_1} M_1 - d_{I_{12}} I_{12} = 0$ , where  $d_{I_{12}} = 1.38/\text{day}$  (43),  $D = K_D = 4 \times 10^{-4} \text{ g/cm}^3$ ,  $M_1 = K_{M_1} = 10^{-4} \text{ g/cm}^3$ , and  $I_{12} = K_{I_{12}} = 8 \times 10^{-10} \text{ g/cm}^3$ . Hence,  $\lambda_{I_{12} D} = d_{I_{12}} I_{12}/(2D) = 1.38 \times 10^{-6}/\text{day}$ ,  $\lambda_{I_{12} M_1} = 5.52 \times 10^{-6}/\text{day}$ .

**Eq. S3.** The half-life of TGF- $\beta$  is about 2 min (49), that is,  $t_{1/2} = 0.0014 \text{ day}$ , so that  $d_{T_\beta} = \ln 2/t_{1/2} = 499.07 \text{ day}^{-1}$ . The concentration of serum TGF- $\beta$  in melanoma is  $2.68 \times 10^{-14} \text{ g/cm}^3$  (50). We assume that the concentration of TGF- $\beta$  in tissue is higher than in serum, and take  $T_\beta = 2.68 \times 10^{-13} \text{ g/cm}^3$ . From the steady state of Eq. S3 we have,  $\lambda_{T_\beta C} C + \lambda_{T_\beta M_2} M_2 + \lambda_{T_\beta T_r} T_r = d_{T_\beta} T_\beta$ , where  $d_{T_\beta} = 499.07 \text{ day}^{-1}$ ,  $T_\beta = K_{T_\beta} = 2.68 \times 10^{-13} \text{ g/cm}^3$ ,  $T_r = K_{T_r} = 5 \times 10^{-4} \text{ g/cm}^3$  by Eq. 1,  $C = K_C = 0.4 \text{ g/cm}^3$ ,  $M_2 = 3.2 \times 10^{-3} \text{ g/cm}^3$ . According to (8, 12), tumor cells secrete more TGF- $\beta$  than M2 macrophages, and we assume that  $\lambda_{T_\beta C} C = 5\lambda_{T_\beta M_2} M_2$  and  $\lambda_{T_\beta T_r} T_r = 5\lambda_{T_\beta C} C$ . Thus  $\lambda_{T_\beta C} = d_{T_\beta} T_\beta/(6.2C) = 5.39 \times 10^{-11} /\text{day}$ ,  $\lambda_{T_\beta M_2} = \lambda_{T_\beta C} C/(5M_2) = 1.35 \times 10^{-9}/\text{day}$ , and  $\lambda_{T_\beta T_r} = 5\lambda_{T_\beta C} C/T_r = 2.16 \times 10^{-7}/\text{day}$ .

**Eq. S4.** The half-life of IL-10 ranges from 1.1 to 2.6 hours (51); we take it to be 2 hours, that is,  $t_{1/2} = 0.08 \text{ day}$ , so that  $d_{I_{10}} = 8.32 \text{ day}^{-1}$ . The concentration of serum IL-10 in tumor is  $8.75 \times 10^{-12} \text{ g/cm}^3$  (52). We assumed that the concentration of  $I_{10}$  in tissue is higher, and take  $I_{12} = K_{I_{10}} = 8.75 \times 10^{-11} \text{ g/cm}^3$ . From the steady state of Eq. (S4) we have,  $\lambda_{I_{10} C} C + \lambda_{I_{10} M_2} M_2 - d_{I_{10}} I_{10} = 0$ , where  $d_{I_{10}} = 8.32 \text{ day}^{-1}$ . Tumor cells secrete more  $I_{10}$  than macrophages (53); accordingly, we take  $\lambda_{I_{10} C} = 10\lambda_{I_{10} M_2}$ . Hence, in steady state,  $\lambda_{I_{10} M_2} = d_{I_{10}} I_{10}/(11M_2) = 2.07 \times 10^{-8}/\text{day}$ ,  $\lambda_{I_{10} C} = 10\lambda_{I_{10} M_2} M_2/C = 1.65 \times 10^{-9}/\text{day}$ .

**Eq. S5.** The half-life of TNF- $\alpha$  is 18.2min (54), that is,  $t_{1/2} = 0.0126 \text{ day}$ , so that  $d_{T_\alpha} = \ln 2/t_{1/2} = 55.01 \text{ day}^{-1}$ . From steady state of Eq. S5, without BETi, we get  $\lambda_{T_\alpha M_1} M_1 + \lambda_{T_\alpha T_1} T_1 - d_{T_\alpha} T_\alpha = 0$ , where  $M_1 = K_{M_1} = 10^{-4} \text{ g/cm}^3$ ,  $T_1 = K_{T_1} = 2 \times 10^{-3} \text{ g/cm}^3$  and  $T_\alpha = K_{T_\alpha} = 3 \times 10^{-11} \text{ g/cm}^3$  (55). TNF- $\alpha$  is produced primarily by macrophages (13, 15), and accordingly we assume that  $\lambda_{T_\alpha M_1} M_1 = 5\lambda_{T_\alpha T_1} T_1$ . Hence,  $\lambda_{T_\alpha T_1} = d_{T_\alpha} T_\alpha/(6T_1) = 1.36 \times 10^{-7}/\text{day}$ , and  $\lambda_{T_\alpha M_1} = 5\lambda_{T_\alpha T_1}/M_1 = 1.36 \times 10^{-6}/\text{day}$ . When BETi drug is applied, we take  $K_{T_\alpha B} = 10K_B = 8.02 \times 10^{-10} \text{ g/cm}^3$ .

**Eq. S6.** From steady state of Eq. S6, we get  $\lambda_{NM_2} M_2 - d_N N = 0$ , where  $d_N = 198/\text{day}$  (56),  $N = K_N = 2 \times 10^{-6} \text{ g/cm}^3$  (56) and  $M_2 = 3.2 \times 10^{-3} \text{ g/cm}^3$ . Hence,  $\lambda_{NM_2} = d_N N/M_2 = 0.12/\text{day}$ .

**Eq. S7.** From steady state of Eq. S7, we get  $\lambda_{WE} E - d_W W = 0$ , where  $\lambda_{WE} = 7 \times 10^{-2}/\text{day}$  (25),  $W = K_W = 4.65 \times 10^{-4} \text{ g/cm}^3$  (25),  $E = K_E = 2.5 \times 10^{-3} \text{ g/cm}^3$  (57). Hence,  $d_W = \lambda_{WE} E/W = 3.76 \times 10^{-1}/\text{day}$ .

**Eq. S8.** From steady state of Eq. S8 without BETi, we get  $(\lambda_{GC} C + \lambda_{GM_2} M_2) - d_G G = 0$ , where  $d_G = 12.6/\text{day}$  (25),  $G = K_G = 7 \times 10^{-8} \text{ g/cm}^3$  (25),  $C = K_C = 0.4 \text{ g/cm}^3$ ,  $M_2 = K_{M_2} = 3.2 \times 10^{-3} \text{ g/cm}^3$ . VEGF is mainly produced

by cancer cells, and we accordingly take  $\lambda_{GC}C = 10\lambda_{GM_2}M_2$ . Hence,  $\lambda_{GM_2} = d_G G / (11M_2) = 2.5 \times 10^{-5}/\text{day}$  and  $\lambda_{GC} = 10\lambda_{GM_2}M_2/C = 2.0 \times 10^{-6}/\text{day}$ . When BETi drug is applied, we take  $K_{GB} = 10K_B = 8.02 \times 10^{-10} \text{ g/cm}^3$ .

**Eq. S9.** From steady state of Eq. S9, we get  $\lambda_{M_C}C - d_{M_C}M_C = 0$ , where  $d_{M_C} = 4.8/\text{day}$  (25),  $M_C = K_{M_C} = 10^{-9} \text{ g/cm}^3$  (25) and  $C = K_C = 0.4 \text{ g/cm}^3$ . Hence,  $\lambda_{M_C}C = d_{M_C}M_C/C = 1.2 \times 10^{-8}/\text{day}$ .

**Eq. S10.** From steady state of Eq. S10, we get  $\lambda_{M_P}M_2 \cdot \frac{1}{2} + \lambda_{M_P}C - d_{M_P}M_P = 0$ , where  $d_{M_P} = 1.73/\text{day}$  (25),  $M_P = K_{M_P} = 2 \times 10^{-7} \text{ g/cm}^3$  (25),  $M_2 = K_{M_2} = 3.2 \times 10^{-3} \text{ g/cm}^3$  and  $C = K_C = 0.4 \text{ g/cm}^3$ . MCP-1 is produced primarily by cancer cells and take  $\lambda_{M_P}C = 10\lambda_{M_P}M_2$ . Hence,  $\lambda_{M_P}M_2 = d_{M_P}M_P/(10.5M_2) = 1.2 \times 10^{-8}/\text{day}$ , and  $\lambda_{M_P}C = 10\lambda_{M_P}M_2/C = 8.24 \times 10^{-7}/\text{day}$ .

**Eqs. S11-S14.** In order to estimate the parameters  $K_{TQ}$  (in Eq. 2), we need to determine the steady state concentrations of  $P$  and  $L$  in the control case (no drugs). To do that, we begin by estimating  $\rho_P$  and  $\rho_L$ .

By (58), the mass of one CTLA-4 is  $m_{C_L} = 25 \text{ kDa} = 4.15 \times 10^{-20} \text{ g}$ , and, by (59), the mass of one B7 is  $m_B = 52.5 \text{ kDa} = 8.12 \times 10^{-20} \text{ g}$ . We assume that the mass of one T cell (or dendritic cell) is  $m_T = m_D = 10^{-9} \text{ g}$ . There are 6000 CTLA-4 proteins on one T cell ( $T_1$  or  $T_8$ ) (60) and 4000 B7 proteins on one dendritic cell (24). Hence  $\rho_P = 6000 \times \frac{m_{C_L}}{m_T} = \frac{6000 \times (4.15 \times 10^{-20})}{10^{-9}} = 2.49 \times 10^{-7}$ , and  $\rho_L = 4000 \times \frac{m_B}{m_D} = \frac{4000 \times (8.12 \times 10^{-20})}{10^{-9}} = 3.25 \times 10^{-7}$ . Taking  $T_1 = K_{T_1} = 2 \times 10^{-3} \text{ g/cm}^3$  and  $T_8 = K_{T_8} = 1 \times 10^{-3} \text{ g/cm}^3$  (61), we get, in steady state of  $C_L$ ,

$$\begin{aligned} K_P = P &= \rho_P(T_1 + T_8) \\ &= (2.49 \times 10^{-7}) \times [2 \times 10^{-3} + 1 \times 10^{-3}] \\ &= 7.47 \times 10^{-10} \text{ g/cm}^3. \end{aligned}$$

We assume that in a steady state  $D = 4 \times 10^{-4} \text{ g/cm}^3$  (61). From Eq. (S12) we then get, in steady state of  $B$ ,

$$\begin{aligned} K_L = L &= \rho_L D = (3.25 \times 10^{-7}) \times (4 \times 10^{-4}) \\ &= 1.3 \times 10^{-10} \text{ g/cm}^3. \end{aligned}$$

In steady state with  $P = K_P$ ,  $L = K_L$  and  $Q = K_Q$ , we have, by Eq. (S14),  $K_Q = \sigma K_P K_L$ . We take  $K_{TQ} = \frac{1}{2} K_Q = \frac{1}{2} \sigma K_P K_L$ . Hence,  $Q/K_{TQ} = PL/(\frac{1}{2} K_P K_L)$  with variables  $P$  and  $L$ , and

$$\frac{1}{1 + Q/K_{TQ}} = \frac{1}{1 + PL/(\frac{1}{2} K_P K_L)} = \frac{1}{1 + PL/K'_{TQ}}$$

where  $K'_{TQ} = \frac{1}{2} K_P K_L = \frac{1}{2} \times (7.47 \times 10^{-10}) \times (1.3 \times 10^{-10}) = 4.86 \times 10^{-20} \text{ g}^2/\text{cm}^6$ .

**Eqs. 10-11.** By (62), the half-life of anti-CTLA-4 (ipilimumab) is 14.7 days, so that  $d_A = \frac{\ln 2}{14.7} = 0.047 \text{ day}^{-1}$ . We assume that 10% of A is used in blocking CTLA-4, while the remaining 90% degrades naturally. Hence,  $\mu_{C_L} C_L A / 10\% = d_A A / 90\%$ , so that

$$\mu_{PA} = \frac{d_A}{9P} = \frac{0.047}{9 \times (7.47 \times 10^{-10})} = 6.99 \times 10^6 \text{ cm}^3/\text{g} \cdot \text{day}.$$

The half-life of BET inhibitor (JQ1) is in the range of 0.1-1.4 hours (63, 64); we take it to be 1.2 hours, so that

$d_B = \frac{\ln 2}{1.2/24} = 13.86 \text{ day}^{-1}$ . We assume that 10% of B is absorbed by cancer cells, while the remaining 90% degrades naturally, so that  $(\mu_{BC}C + \mu_{BM_1}M_1) \frac{B}{K_B + B} / 10\% = d_B B / 90\%$ , or  $\mu_{BC}C + \mu_{BM_1}M_1 = 2d_B B / 9$ , where  $C = K_C = 0.4 \text{ g/cm}^3$ ,  $M_1 = K_{M_1} = 10^{-4} \text{ g/cm}^3$ . From Eq. 11, we get  $B \geq \gamma_B / d_B$ , and we assume that

$$B \sim \frac{10}{9} \cdot \frac{\gamma_B}{d_B},$$

where  $d_B = 13.86/\text{day}$ .

In mice experiment with BETi and PD-1, BETi was given daily and CTLA-4 inhibitor was given 3 times/week. For simplicity, we take  $\hat{A}(t) = \gamma_A$  and  $\hat{B}(t) = \gamma_B$  as constants. It is difficult to compare the amount of administering dose of BETi to the actual parameter  $\gamma_B$  which appears in Eq.11, because no information is available on the PK/PD of the drug. We arbitrarily take  $\gamma_B$  to be order of magnitude  $10^{-9} \text{ g/cm}^3 \cdot \text{day}$  in the simulations. Hence,  $B = K_B = 8.02 \times 10^{-11} \text{ g/cm}^3$  in steady state.

We assume that the absorption rates of BETi by cancer cells and M1 macrophages are the same, i.e.,  $\mu_{BC} = \mu_{BM_1}$ , so that  $\mu_{BC} = \mu_{BM_1} = \frac{2d_B B}{9(C+M_1)} = 6.17 \times 10^{-10}/\text{day}$ .

By taking  $\gamma_B = 0.15 \times 10^{-9} \text{ g/cm}^3 \cdot \text{day}$  and  $\gamma_A = 1.5 \times 10^{-9} \text{ g/cm}^3 \cdot \text{day}$ , we find that the tumor volume growth agrees qualitatively with the our experimental results when we apply just one drug or a combination of drug. We shall accordingly take  $\gamma_B$  to vary in the range  $0 - 0.32 \times 10^{-9} \text{ g/cm}^3 \cdot \text{day}$  and  $\gamma_A$  to vary in the range  $0 - 1.5 \times 10^{-9} \text{ g/cm}^3 \cdot \text{day}$ . We choose  $\varepsilon_B = 20/K_B = 2 \times 10^{10} \text{ cm}^3/\text{g}$  in Eqs. 3 and 4.

**Sensitivity analysis.** We performed sensitivity analysis with respect to the tumor volume at day 30 for two sets of parameters. The first set consists of production parameters for cells, including  $\lambda_{DC}$ ,  $\lambda_{T_1 I_{12}}$ ,  $\lambda_{T_8 I_{12}}$ ,  $\lambda_{T_r T_\beta}$ ,  $\lambda_{M_1}$ ,  $\lambda_{M_2}$ ,  $\lambda_E$ ,  $\lambda_{CW}$ ,  $\lambda_{T_\alpha M_1}$ ,  $\lambda_{T_\alpha T_1}$ . Following the method of (65), we performed Latin hypercube sampling and generated 5000 samples to calculate the partial rank correlation coefficients (PRCC) and the p-values with respect to the tumor volume at day 30. In sampling all the parameters, we took the range of each parameter from 1/2 to twice its value in Table S2. The results are shown in Fig. S3. Fig. S3 shows that if the production parameters of  $T_1$ ,  $T_8$  and (to lesser extend)  $M_1$  and  $D$  increase then tumor volume will increase, whereas if the production parameters of Treg, endothelial cells and  $M_2$  increase then the tumor volume will increase.

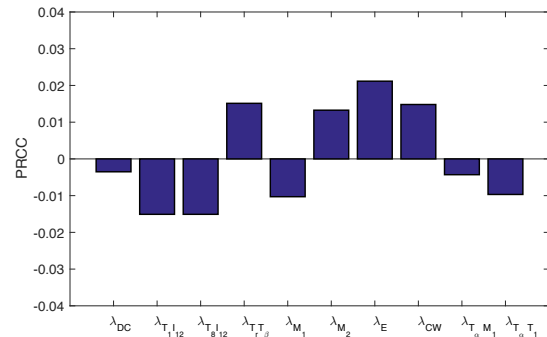

**Fig. S3.** Statistically significant PRCC values (p-value < 0.01) for  $R(t)$  at day 30.

The second set of parameters in the sensitivity analysis are  $\beta_{M_1}$ ,  $\beta_{M_2}$ ,  $\eta_8$ ,  $\eta_1$ ,  $K_{TQ}$ ,  $\epsilon_{TB}$ ,  $K_{T_r B}$ ,  $K_{CB}$ ,  $K_{T_a B}$ ,  $K_{GB}$ , which play important roles in the dynamics of tumor cells. Here again we sampled all the parameters by taking the range of each parameter for 1/2 to twice its value in Tables S2 and S3. The results are shown in Fig. S4. Fig. S4 shows that the tumor volume decreases when the killing rates by  $T_1$  and  $T_8$  increase and when the inhibition of  $Q$  (represented by  $1/K_{CB}$ ) decreases, whereas the tumor volume increases when inhibitions of  $T_r$  and  $C$  by BETi (represented by  $1/K_{TQ}$ ) decrease.

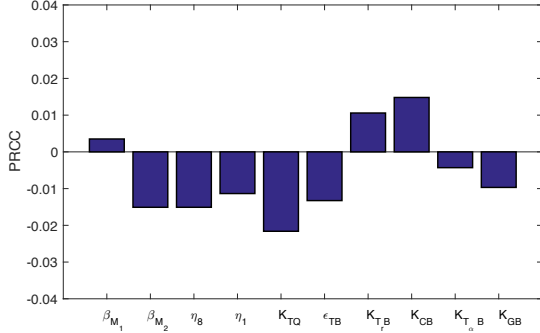

Fig. S4. Statistically significant PRCC values ( $p$ -value  $< 0.01$ ) for  $R(t)$  at day 30.

We also note that the switching parameters from  $\beta_{M_1}$  (from  $M_2$  to  $M_1$ ) and  $\beta_{M_2}$  (from  $M_1$  to  $M_2$ ) increase tumor volume as  $\beta_{M_1}$  increases and  $\beta_{M_2}$  decreases, but the effect of  $\beta_{M_2}$  is more significant.

### Combination of BETi and anti-PD-L1

PD-1 is an immunoinhibitory receptor predominantly expressed on activated T cells (59, 66). Its ligand PD-L1 is upregulated on the same activated T cells, and is also expressed by myeloid-derived suppressor cells (MDSCs) (66–68) and in some human cancer cells (66, 67). Both PD-1 and PD-L1 are immune checkpoints: the complex PD-1-PD-L1 inhibits T cell function against cancer (59). It was recently shown that combining anti-PD-1 antibody with BETi (JQ1) is synergistic and leads to higher anti-tumor responses compared to each drug given alone (69). In the following we consider the combination of BETi (e.g. JQ1) and anti-PD-L1 (e.g. durvalumab). The model is similar to the model for combination of BETi and anti-CTLA-4, with some changes given below.

**Equation for activated Tregs ( $T_r$ ).** The complex PD-1-PD-L1 enhances the expression of PTEN, which results in upregulation of Fox3+ in naive T cells, inducing them to differentiate into Tregs ( $T_r$ ) (70). The production of  $T_r$  is also enhanced by TGF- $\beta$  ( $T_\beta$ ) (9, 11). Hence,

$$\begin{aligned} \frac{\partial T_r}{\partial t} + \nabla \cdot (\mathbf{u}T_r) - \delta_T \nabla^2 T_r \\ = T_{10} \left( \underbrace{\lambda_{T_r T_\beta} \frac{T_\beta}{K_{T_\beta} + T_\beta}}_{\text{TGF-}\beta \text{ induced proliferation}} + \underbrace{\lambda_{T_r \tilde{Q}} \frac{\tilde{Q}}{K_{\tilde{Q}} + \tilde{Q}}}_{\text{promotion by PD-1-PD-L1}} \right) - \underbrace{d_{T_r} T_r}_{\text{death}} \end{aligned} \quad [\text{S19}]$$

**Equation for PD-1 ( $\tilde{P}$ ), PD-L1 ( $\tilde{L}$ ) and PD-1-PD-L1 ( $\tilde{Q}$ ).** PD-1 is expressed on the surface of activated  $CD4^+$  T cells, activated  $CD8^+$  T cells and Tregs (59, 66). We assume

that the number of PD-1 per cell is the same for  $T_1$  and  $T_8$  cells, but is smaller, by a factor  $\epsilon_T$ , for  $T_r$  cells. If we denote by  $\rho_{\tilde{P}}$  the ratio between the mass of one PD-1 protein to the mass of one T cell, then

$$\tilde{P} = \rho_{\tilde{P}}(T_1 + T_8 + \epsilon_T T_r). \quad [\text{S20}]$$

PD-L1 is expressed on the surface of activated  $CD4^+$  T cells, activated  $CD8^+$  T cells (66), Tregs (71), M2 macrophages (66, 67), and cancer cells (66, 67). We assume that the number of PD-L1 per cell is the same for  $T_1$  and  $T_8$  cells, and denote the ratio between the mass of one PD-L1 protein to the mass of one cell by  $\rho_{\tilde{L}}$ . Then

$$\tilde{L} = \rho_{\tilde{L}}(T_1 + T_8 + \epsilon_T T_r + \epsilon_M M_2 + \epsilon_C C),$$

where  $\epsilon_C$  and  $\epsilon_M$  depend on the specific type of tumor.

The coefficient  $\rho_{\tilde{L}}$  is constant when no anti-PD-L1 drug is administered. And in this case,  $\tilde{L}$  satisfies the equation

$$\begin{aligned} \frac{\partial \tilde{L}}{\partial t} + \nabla \cdot (\mathbf{u}\tilde{L}) - \delta_T \nabla^2 \tilde{L} = \rho_{\tilde{L}} \left[ \frac{\partial(T_1 + T_8 + \epsilon_T T_r + \epsilon_M M_2 + \epsilon_C C)}{\partial t} \right. \\ \left. + \nabla \cdot (\mathbf{u}(T_1 + T_8 + \epsilon_T T_r + \epsilon_M M_2 + \epsilon_C C)) \right. \\ \left. - \delta_T \nabla^2 (T_1 + T_8 + \epsilon_T T_r + \epsilon_M M_2 + \epsilon_C C) \right]. \end{aligned}$$

Recalling the equations of cells, we get

$$\begin{aligned} \frac{\partial \tilde{L}}{\partial t} + \nabla \cdot (\mathbf{u}\tilde{L}) - \delta_T \nabla^2 \tilde{L} = \rho_{\tilde{L}} [\text{RHS of Eq. 3} + \text{RHS of Eq. 4} \\ + \epsilon_T \times \text{RHS of Eq. S19} + \epsilon_M \times \text{RHS of Eq. 7} + \epsilon_C \times \text{RHS of Eq. 9}] \end{aligned}$$

with  $Q$  replaced by  $\tilde{Q}$  in Eqs. 3 and 4.

When anti-PD-L1 drug ( $\tilde{A}$ ) is applied, PD-L1 is depleted (or blocked) by  $\tilde{A}$ . In this case, the ratio  $\frac{\tilde{L}}{T_1 + T_8 + \epsilon_T T_r + \epsilon_M M_2 + \epsilon_C C}$  may change. In order to include in the model both cases of with and without anti-PD-L1, we replace  $\rho_{\tilde{L}}$  in the previous equation by  $\frac{\tilde{L}}{T_1 + T_8 + \epsilon_T T_r + \epsilon_M M_2 + \epsilon_C C}$ . Hence,

$$\begin{aligned} \frac{\partial \tilde{L}}{\partial t} + \nabla \cdot (\mathbf{u}\tilde{L}) - \delta_T \nabla^2 \tilde{L} = \frac{\tilde{L}}{T_1 + T_8 + \epsilon_T T_r + \epsilon_M M_2 + \epsilon_C C} \\ \times [\text{RHS of Eq. 3} + \text{RHS of Eq. 4} + \epsilon_T \times \text{RHS of Eq. S19} \\ + \epsilon_M \times \text{RHS of Eq. 7} + \epsilon_C \times \text{RHS of Eq. 9}] - \underbrace{\mu_{\tilde{L}\tilde{A}} \tilde{L}\tilde{A}}_{\text{depletion by anti-PD-L1}}, \end{aligned}$$

where  $\mu_{\tilde{L}\tilde{A}}$  is the depletion rate of PD-L1 by anti-PD-L1.

When BETi is applied, the expression of PD-L1 by cancer cells is suppressed (69, 72), so that

$$\tilde{L} = \rho_{\tilde{L}} \left( T_1 + T_8 + \epsilon_T T_r + \epsilon_M M_2 + \epsilon_C C \frac{1}{1 + B/K_{LB}} \right).$$

When the two drugs are combined, the equation for  $L$  takes the form

$$\begin{aligned} \frac{\partial \tilde{L}}{\partial t} + \nabla \cdot (\mathbf{u}\tilde{L}) - \delta_T \nabla^2 \tilde{L} \\ = \frac{\tilde{L}}{T_1 + T_8 + \epsilon_T T_r + \epsilon_M M_2 + \epsilon_C C / (1 + B/K_{LB})} \\ \times [\text{RHS of Eq. 3} + \text{RHS of Eq. 4} \\ + \epsilon_T \times \text{RHS of Eq. S19} + \epsilon_M \times \text{RHS of Eq. 7} \\ + \epsilon_C \frac{1}{1 + B/K_{LB}} \times \text{RHS of Eq. 9}] \\ - \underbrace{\mu_{\tilde{L}\tilde{A}} \tilde{L}\tilde{A}}_{\text{depletion by anti-PD-L1}} \end{aligned} \quad [\text{S21}]$$

Note that in this equation we did not include the derivative of  $\frac{1}{1+B/K_B}$  since, in equation of  $B$  (Eq. 11),  $d_B$  is large (see the estimates of Eq. 11) and hence  $\frac{dB}{dt}$  is very small.

PD-L1 from T cells, M2 macrophages or cancer cells combines with PD-1 on the plasma membrane of T cells, to form a complex PD-1-PD-L1 ( $\tilde{Q}$ ) on the T cells (66, 67). Denoting the association and disassociation rates of  $\tilde{Q}$  by  $\alpha_{\tilde{P}\tilde{L}}$  and  $d_{\tilde{Q}}$ , respectively, we can write

$$\tilde{P} + \tilde{L} \xrightleftharpoons[d_{\tilde{Q}}]{\alpha_{\tilde{P}\tilde{L}}} \tilde{Q}.$$

The half-life of  $\tilde{Q}$  is less than 1 second (i.e.  $1.16 \times 10^{-5}$  day) (23), so that  $d_{\tilde{Q}}$  is very large. Hence we may approximate the dynamical equation for  $\tilde{Q}$  by the steady state equation,  $\alpha_{\tilde{P}\tilde{L}}\tilde{P}\tilde{L} = d_{\tilde{Q}}\tilde{Q}$ , or

$$\tilde{Q} = \tilde{\sigma}\tilde{P}\tilde{L}, \quad [\text{S22}]$$

where  $\tilde{\sigma} = \alpha_{\tilde{P}\tilde{L}}/d_{\tilde{Q}}$ .

### Parameter estimation for the anti-PD-L1 model.

**Diffusion coefficients.**  $M_{\tilde{A}} = 146.3\text{kDa}$  (Durvalumab) (36), hence  $\delta_{\tilde{A}} = 4.73 \times 10^{-2} \text{ cm}^2 \text{ day}^{-1}$ .

**Eq. S19.** We assume that TGF- $\beta$  activates Tregs more than PD-1-PD-L1 does, and take  $\lambda_{T_r T_\beta} = 5\lambda_{T_r \tilde{Q}}$ . From the steady state of Eq. 5, we get,  $(\lambda_{T_r T_\beta} \cdot \frac{1}{2} + \lambda_{T_r \tilde{Q}} \cdot \frac{1}{2})T_{10} - d_{T_r}T_r = 0$ , where  $T_{10} = 1 \times 10^{-3} \text{ g/cm}^3$ ,  $T_r = K_{T_r} = 5 \times 10^{-4} \text{ g/cm}^3$  (43), and  $d_{T_r} = 0.2/\text{day}$  (43). Hence  $\lambda_{T_r \tilde{Q}} = 0.083/\text{day}$  and  $\lambda_{T_r T_\beta} = 0.415/\text{day}$ .

**Eqs. S20-S22.** In order to estimate the parameters  $K_{T\tilde{Q}}$  (in Eqs. 3 and 4 and  $K_{\tilde{Q}}$  (in Eq. 5 with  $Q$  replaced by  $\tilde{Q}$ ), we need to determine the steady state concentrations of  $\tilde{P}$  and  $\tilde{L}$  in the control case (no drugs). To do that, we begin by estimating  $\rho_{\tilde{P}}$  and  $\rho_{\tilde{L}}$ .

By (58), the mass of one PD-1 is  $m_{\tilde{P}} = 8.3 \times 10^{-8} \text{ pg} = 8.3 \times 10^{-20} \text{ g}$ , and by (59) the mass of one PD-L1 is  $m_{\tilde{L}} = 5.8 \times 10^{-8} \text{ pg} = 5.8 \times 10^{-20} \text{ g}$ . We assume one T cell is  $m_T = 10^{-9} \text{ g}$ . By (24), there are 3000 PD-1 proteins and 9000 PD-L1 proteins on one T cell ( $T_1$  or  $T_8$ ). Since  $\rho_{\tilde{P}}T$  is the density of PD-1 (without anti-PD-1 drug), we get  $\rho_{\tilde{P}} = 3000 \times \frac{m_{\tilde{P}}}{m_T} = \frac{3000 \times (8.3 \times 10^{-20})}{10^{-9}} = 2.49 \times 10^{-7}$ , and  $\rho_{\tilde{L}} = 9000 \times \frac{m_{\tilde{L}}}{m_T} = \frac{9000 \times (5.8 \times 10^{-20})}{10^{-9}} = 5.22 \times 10^{-7}$ . PD-1 is expressed by Tregs at higher or lower level than in  $T_1$  and  $T_8$  cells depending on the type of the cancer (73); we assume that  $\varepsilon_T = 0.8$ . Hence, in steady state,

$$\begin{aligned} \tilde{P} &= \rho_{\tilde{P}}(T_1 + T_8 + \varepsilon_T T_r) \\ &= (2.49 \times 10^{-7}) \times [2 \times 10^{-3} + 1 \times 10^{-3} + 0.8 \times (5 \times 10^{-4})] \\ &= 8.46 \times 10^{-10} \text{ g/cm}^3. \end{aligned}$$

The parameter  $\varepsilon_C$  in Eq. S21 depends on the type of cancer. We take  $\varepsilon_C = 0.01$  (74), and  $\varepsilon_M = 0.005$ . Then, by Eq. S21, we get

$$\begin{aligned} K_{\tilde{L}} = \tilde{L} &= \rho_{\tilde{L}}(T_1 + T_8 + \varepsilon_M M + \varepsilon_C C) \\ &= (5.22 \times 10^{-7}) \times [3 \times 10^{-3} + 0.005 \times 0.4 + 0.01 \times 0.4] \\ &= 4.7 \times 10^{-9} \text{ g/cm}^3. \end{aligned}$$

In steady state with  $\tilde{P} = K_{\tilde{P}}$ ,  $\tilde{L} = K_{\tilde{L}}$  and  $\tilde{Q} = K_{\tilde{Q}}$ , we have, by Eq. S22,  $K_{\tilde{Q}} = \sigma K_{\tilde{P}} K_{\tilde{L}}$ . We take  $K_{T\tilde{Q}} = \frac{1}{2} K_{\tilde{Q}} = \frac{1}{2} \sigma K_{\tilde{P}} K_{\tilde{L}}$ . Hence,  $\tilde{Q}/K_{T\tilde{Q}} = \tilde{P}\tilde{L}/(\frac{1}{2} K_{\tilde{P}} K_{\tilde{L}})$  and we then have in Eqs. 3 and 4,

$$\frac{1}{1 + \tilde{Q}/K_{T\tilde{Q}}} = \frac{1}{1 + \tilde{P}\tilde{L}/(\frac{1}{2} K_{\tilde{P}} K_{\tilde{L}})} = \frac{1}{1 + \tilde{P}\tilde{L}/K'_{T\tilde{Q}}},$$

where  $K'_{T\tilde{Q}} = \frac{1}{2} K_{\tilde{P}} K_{\tilde{L}} = \frac{1}{2} \times (8.46 \times 10^{-10}) \times (4.7 \times 10^{-9}) = 1.99 \times 10^{-18} \text{ g}^2/\text{cm}^6$ . Similarly, we have in Eq. S19,

$$\frac{\tilde{Q}}{K_{\tilde{Q}} + \tilde{Q}} = \frac{1}{1 + K_{\tilde{Q}}/\tilde{Q}} = \frac{1}{1 + K_{\tilde{P}} K_{\tilde{L}}/\tilde{P}\tilde{L}} = \frac{1}{1 + K'_{\tilde{Q}}/\tilde{P}\tilde{L}},$$

where  $K'_{\tilde{Q}} = K_{\tilde{P}} K_{\tilde{L}} = 3.98 \times 10^{-18} \text{ g}^2/\text{cm}^6$ . Similarly, when BETi drug is applied, it reduces the expression of PD-L1 on cancer cells by a factor  $1/(1 + B/K_{\tilde{L}B})$  where we take  $K_{\tilde{L}B} = 2K_B = 1.64 \times 10^{-10} \text{ g/cm}^3$ .

**Eqs. 10-11.** By (75), the half-life of anti-PD-L1 is 15 days, so that  $d_A = \frac{\ln 2}{15} = 0.046 \text{ day}^{-1}$ . We assume that 10% of A is used in blocking PD-L1, while the remaining 90% degrades naturally. Hence,  $\mu_{LA} LA/10\% = d_A A/90\%$ , so that

$$\mu_{LA} = \frac{d_A}{9L} = \frac{0.046}{9 \times (4.7 \times 10^{-9})} = 1.09 \times 10^6 \text{ cm}^3/\text{g} \cdot \text{day}.$$

By taking  $\gamma_A = 5 \times 10^{-9} \text{ g/cm}^3 \cdot \text{day}$  and  $\gamma_B = 0.2 \times 10^{-9} \text{ g/cm}^3 \cdot \text{day}$ , we find that the tumor volume growth agrees qualitatively with the experimental results in (76, 77) when we apply just one drug or a combination of drug. We shall accordingly take  $\gamma_B$  to vary in the range  $0 - 5 \times 10^{-9} \text{ g/cm}^3 \cdot \text{day}$  and  $\gamma_A$  to vary in the range  $0 - 8 \times 10^{-9} \text{ g/cm}^3 \cdot \text{day}$ .

**Results.** Figure S5-(A) shows that BETi, and anti-PD-L1 as single agents reduce tumor volume, and in combination the reduction by more than 75% at day 30.

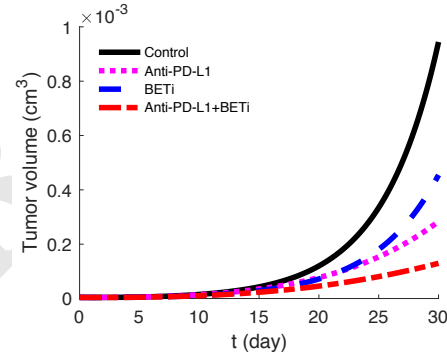

**Fig. S5. The growth of tumor volume during the administration of anti-PD-L1 drug and BETi.** Numerical simulation result with anti-PD-L1 is administered at rate  $\gamma_{\tilde{A}} = 5 \times 10^{-9} \text{ g/cm}^3 \cdot \text{day}$  and BETi is administered at rate  $\gamma_B = 0.6 \times 10^{-9} \text{ g/cm}^3 \cdot \text{day}$ . All other parameter values are the same as in Tables S2, S3 and S4.

Fig. S6 is the efficacy map of the combined therapy, with  $\gamma_B$  in the range of  $0 - 0.2 \times 10^{-9} \text{ g/cm}^3 \cdot \text{day}$  and  $\gamma_{\tilde{A}}$  in the range of  $0 - 1.8 \times 10^{-9} \text{ g/cm}^3 \cdot \text{day}$ . The color column shows the efficacy for any pair of  $(\gamma_B, \gamma_{\tilde{A}})$ ; the maximum efficacy is 0.98 (98%). We see that the two drugs are positively correlated in the sense that tumor volume decreases as each of the drugs is increased. Fig. S7 shows the average concentration of TNF- $\alpha$ ,  $T\alpha_{30}(\gamma_B, \gamma_{\tilde{A}})$ , at day 30 under combined therapy with anti-PD-L1 ( $\gamma_{\tilde{A}}$ ) and BETi ( $\gamma_B$ ). We conclude, as in the case of anti-CTLA-4, that in order to achieve a largest tumor volume reduction with minimum TNF- $\alpha$  we should take a pair  $(\gamma_B, \gamma_{\tilde{A}})$  with the smallest  $\gamma_B$ .

Since BETi suppresses PD-L1 expression by tumor cells (72), but may not suppress CTLA-4 expression, we carried

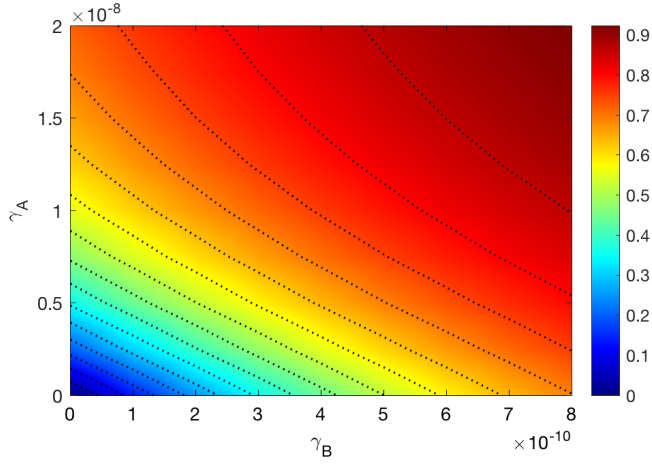

**Fig. S6. Drug efficacy map.** The color column shows the efficacy  $E(\gamma_B, \gamma_A)$  when  $\gamma_B$  varies between  $0 - 0.2 \times 10^{-9} \text{ g/cm}^3 \cdot \text{day}$  and  $\gamma_A$  varies between  $0 - 1.8 \times 10^{-9} \text{ g/cm}^3 \cdot \text{day}$ . All other parameter values are the same as in Tables S2, S3 and S4.

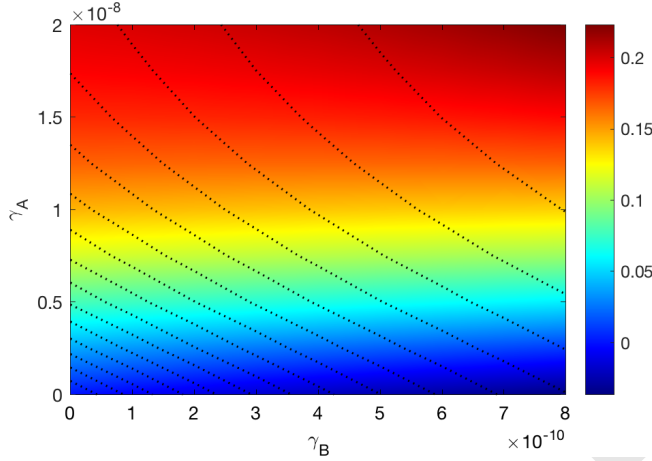

**Fig. S7. Average density of TNF- $\alpha$ .** The color column shows the 'adverse effect' function  $AE(\gamma_B, \gamma_A)$  when  $\gamma_B$  varies between  $0 - 0.2 \times 10^{-9} \text{ g/cm}^3 \cdot \text{day}$  and  $\gamma_A$  varies between  $0 - 1.8 \times 10^{-9} \text{ g/cm}^3 \cdot \text{day}$ . All other parameter values are the same as in Tables S2, S3 and S4.

out murine study with combination of BETi and anti-CTLA-4 only.

The above model with small modifications applies extends to combination therapy with BETi and anti-PD-1.

## Computational method

We employ moving mesh method (78) to numerically solve the free boundary problem for the tumor proliferation model. To illustrate this method, we take Eq. 2 as example and rewrite it as the following form:

$$\frac{\partial D(r, t)}{\partial t} = \delta_D \Delta D(r, t) - \text{div}(\mathbf{u}D) + F, \quad [\text{S23}]$$

where  $F$  represents the term in the right hand side of Eq. 2. Let  $r_i^k$  and  $D_i^k$  denote numerical approximations of  $i$ -th grid point and  $D(r_i^k, n\tau)$ , respectively, where  $\tau$  is the size of time-step. The discretization of Eq. S23 is derived by the

fully implicit finite difference scheme:

$$\begin{aligned} \frac{D_i^{k+1} - D_i^k}{\tau} &= \delta_D \left( D_{rr} + \frac{2}{r_i^k} D_r \right) \\ &- \left( \frac{2}{r_i^{k+1}} u_i^{k+1} + u_r \right) D_i^{k+1} - u_i^{k+1} D_r + F_i^{k+1}, \end{aligned} \quad [\text{S24}]$$

where  $D_r = \frac{h_{-1}^2 D_{i+1}^{k+1} - h_1^2 D_{i-1}^{k+1} - (h_1^2 - h_{-1}^2) D_i^{k+1}}{h_1(h_{-1}^2 - h_1 h_{-1})}$ ,  $D_{rr} = 2 \frac{h_{-1} D_{i+1}^{k+1} - h_1 D_{i-1}^{k+1} + (h_1 - h_{-1}) D_i^{k+1}}{h_1(h_1 h_{-1} - h_{-1}^2)}$ ,  $u_r = \frac{h_{-1}^2 u_{i+1}^{k+1} - h_1^2 u_{i-1}^{k+1} - (h_1^2 - h_{-1}^2) u_i^{k+1}}{h_1(h_{-1}^2 - h_1 h_{-1})}$ ,  $h_{-1} = r_{i-1}^{k+1} - r_i^{k+1}$  and  $h_1 = r_{i+1}^{k+1} - r_i^{k+1}$ . The mesh moves by  $r_i^{k+1} = r_i^k + u_i^{k+1} \tau$ , where  $u_i^{k+1}$  is solved by the velocity equation.



1. Sims GP, Rowe DC, Rietdijk ST, Herbst R, Coyle AJ (2010) Hmgb1 and rage in inflammation and cancer. *Annu Rev Immunol* 28:367–388.
2. Zandarashvili L, et al. (April 2013) Real-time kinetics of high-mobility group box 1 (hmgb1) oxidation in extracellular fluids studied by in situ protein nmr spectroscopy. *J Biol Chem* 288(17):11621–11627.
3. Palucka J, Banchereau J (Mar 2012) Cancer immunotherapy via dendritic cells. *Nat Rev Cancer* 12(4):265–277.
4. Saenz R, et al. (Aug 2014) Tlr4-dependent activation of dendritic cells by an hmgb1-derived peptide adjuvant. *J Transl Med* 12(211):1–11.
5. Janco JMT, Lamichhane P, Karyampudi L, Knutson KL (Apr 2015) Tumor-infiltrating dendritic cells in cancer pathogenesis. *J Immunol* 194(7):2985–2991.
6. Ma Y, Shurin GV, Peiyuan Z, Shurin MR (2013) Dendritic cells in the cancer microenvironment. *J Cancer* 4(1):36–44.
7. Obeid E, Nanda R, Fu YX, Olopade OI (Jul 2013) The role of tumor-associated macrophages in breast cancer progression (review). *Int J Oncol* 43(1):5–12.
8. Perrot CY, Javelaud D, Mauviel A (May 2013) Insights into the transforming growth factor-beta signaling pathway in cutaneous melanoma. *Ann Dermatol* 25(2):135–144.
9. Whiteside TL (August 2015) The role of regulatory t cells in cancer immunology. *Immunotargets Ther* 4:159–171.
10. Condamine T, Gabrilovich DI (January 2011) Molecular mechanisms regulating myeloid-derived suppressor cell differentiation and function. *Trends Immunol* 32(1):19–25.
11. Umansky V, Blattner C, Gebhardt C, Utikal J (November 2016) The role of myeloid-derived suppressor cells (mdsc) in cancer progression. *Vaccines* 4(36):1–16.
12. Cantelli G, Crosas-Molist E, Georgouli M, Sanz-Moreno V (August 2016) Tgf $\beta$ -induced transcription in cancer. *Seminars in Cancer Biology* p. <http://dx.doi.org/10.1016/j.semcancer.2016.08.009>.
13. Beikina AC, Nikolajczyk BS, Denis GV (Apr 2013) Bet protein function is required for inflammation: Brd2 genetic disruption and bet inhibitor jq1 impair mouse macrophage inflammatory responses. *J Immunol* 190(7):3670–3678.
14. Jiaodong Zhang, Mehul B. Patel RGAMYSNSK, et al. (Dec 2014) Tumor necrosis factor-alpha produced in the kidney contributes to angiotensin ii-dependent hypertension. *Hypertension* 64(6):1275–1281.
15. Chen X, Oppenheim JJ (Dec 2011) Contrasting effects of tnf and anti-tnf on the activation of effector t cells and regulatory t cells in autoimmunity. *FEBS Lett* 585(23):3611–3618.
16. Gabrilovich DI, Nagaraj S (Mar 2009) Myeloid-derived suppressor cells as regulators of the immune system. *Nat Rev Immunol* 9(3):162–74.
17. Gabrilovich DI, Ostrand-Rosenberg S, Bronte V (Mar 2012) Coordinated regulation of myeloid cells by tumours. *Nat Rev Immunol* 12(4):253–268.
18. Szomolay B, Eubank TD, Roberts RD, Marsh CB, Friedman A (June 2012) Modeling the inhibition of breast cancer growth by gm-csf. *J Theor Biol* 303:141–151.
19. Chanmee T, Ontong P, Konno K, Itano N (August 2014) Tumor-associated macrophages as major players in the tumor microenvironment. *Cancers* 6(3):1670–1690.
20. Shu S, Polyak K (Jan 6, 2017) Bet bromodomain proteins as cancer therapeutic targets. *Cold Spring Harb Symp Quant Biol* pii: 030908;doi: 10.1101/sqb.2016.81.030908.
21. da Motta LL, et al. (Jan 2017) The bet inhibitor jq1 selectively impairs tumour response to hypoxia and downregulates ca9 and angiogenesis in triple negative breast cancer. *Oncogene* 36(1):122–132.
22. Markowitz J, Wesolowski R, Papenfuss T, Brooks TR, Carson WE (July 2013) Myeloid-derived suppressor cells in breast cancer. *Breast Cancer Res Treat* 140(1):13–21.
23. Mautea RL, et al. (Nov 2015) Engineering high-affinity pd-1 variants for optimized immunotherapy and immuno-pet imaging. *Proc Natl Acad Sci USA* 112(47):E6506–14.
24. Cheng X, et al. (Apr 2013) Structure and interactions of the human programmed cell death 1 receptor. *J Biol Chem* 288(17):11771–11785.
25. Hao W, Friedman A (Apr 2016) Serum upar as biomarker in breast cancer recurrence: A mathematical model. *PLoS ONE* 11(4):e0153508.
26. Young ME (1980) Estimation of diffusion coefficients of proteins. *Biotechnology and Bioengineering* XXII:947–955.
27. Shui YB, et al. (2003) Vascular endothelial growth factor expression and signaling in the lens. *Invest Ophthalmol Vis Sci* 44(9):3911–3919.
28. Liao KL, Bai XF, Friedman A (2014) Mathematical modeling of interleukin-27 induction of anti-tumor t cells response. *PLoS ONE* 9(3):e91844.
29. PhosphoSitePlus/ (2003) Il2 (human), <http://www.phosphosite.org/proteinaction?id=14691&showallsites=true>.
30. Hamza T, Barnett JB, Li B (Feb 2010) Interleukin 12 a key immunoregulatory cytokine in infection applications. *Int J Mol Sci* 11(3):789–806.
31. Poniatowski LA, Wojdasiewicz P, Gasik R, Szukiewicz D (2015) Transforming growth factor beta family: Insight into the role of growth factors in regulation of fracture healing biology and potential clinical applications. *Mediators of Inflammation* 2015(Article ID 137823):1–17.
32. PhosphoSitePlus/ (2003) Il10(human), <http://www.phosphosite.org/proteinaction.action?id=2473887>.
33. PhosphoSitePlus/ (2003) Tnf-a (human), <http://www.phosphosite.org/proteinaction?id=8542247&showallsites=true>.
34. PhosphoSitePlus/ (2003) M-csf (human), <http://www.phosphosite.org/proteinaction?id=15907&showallsites=true>.
35. PhosphoSitePlus/ (2003) Ccl2 (human), <http://www.phosphosite.org/proteinaction?id=14083910&showallsites=true>.
36. Longoria TC, Tewari KS (Oct 2016) Evaluation of the pharmacokinetics and metabolism of pembrolizumab in the treatment of melanoma. *Expert Opin Drug Metab Toxicol* 12(10):1247–1253.
37. Abcam/ (1998) (+)-jq1 (ab141498), <http://www.abcam.com/-jq1-ab141498.html>.
38. Steptoe RJ, Patel RK, Subbotin VM, Thomson AW (2000) Comparative analysis of dendritic cell density and total number in commonly transplanted organs: morphometric estimation in normal mice. *Transpl Immunol* 8(1):49–56.
39. Bergstresser PR, Fletcher CR, Streilein JW (1980) Surface densities of langerhans cells in relation to rodent epidermal sites with special immunologic properties. *J Invest Dermatol* 74(2):77–88.
40. Romani N, Clausen BE, Stoitzner P (March 2010) Langerhans cells and more: langerin-expressing dendritic cell subsets in the skin. *Immunol Rev* 234(1):120–141.
41. Dumortier H, et al. (2005) Antigen presentation by an immature myeloid dendritic cell line does not cause ctl deletion in vivo, but generates cd8+ central memory-like t cells that can be rescued for full effector function. *J Immunol* 175(2):855–863.
42. Ataera H, Hyde E, Price KM, Stoitzner P, Ronchese F (March 2011) Murine melanoma-infiltrating dendritic cells are defective in antigen presenting function regardless of the presence of cd4cd25 regulatory t cells. *PLoS One* 6(3):e17515.
43. Hao W, Friedman A (2017) The role of exosomes in pancreatic cancer microenvironment. *Bull Math Biol* <https://doi.org/10.1007/s11538-017-0254-9>.
44. Hussein MR (Jun 2006) Tumour-associated macrophages and melanoma tumourigenesis: integrating the complexity. *Int J Exp Pathol* 87(3):163–176.
45. Hao W, Rovin BH, Friedman A (September 2014) Mathematical model of renal interstitial fibrosis. *Proc Natl Acad Sci U S A* 111(39):14193–14198.
46. Chen D, et al. (Oct 2014) Involvement of tumor macrophage hits in chemotherapy effectiveness: mathematical modeling of oxygen, ph, and glutathione. *PLoS ONE* 9(10):e107511.
47. Chun Y, et al. (2008) Elevated interleukin-12 is a plasma marker of poor prognosis in stage iii melanoma patients. *American Association for Cancer Research AACR Meeting 2008*(Abstract 5568).
48. Bankhead C (2008) Aacr: Il-12 level may predict melanoma prognosis. *Medpage Today* p. <http://www.medpagetoday.com/meetingcoverage/aacr/9177>.
49. Kaminska B, Wesolowska A, Danilkiewicz M (2005) Tgf beta signalling and its role in tumour pathogenesis. *Acta Biochim Pol* 52(2):329–337.
50. Kyrtonis MC, et al. (1998) Serum transforming growth factor-beta 1 is related to the degree of immunoparesis in patients with multiple myeloma. *Med Oncol* 15(2):124–128.
51. Mueller C, et al. (2009) The pros and cons of immunomodulatory il-10 gene therapy with recombinant aav in a cfr-dependent allergy mouse model. *Gene Therapy* 16:172–183.
52. Nemunaitis J, Fong T, Shabe P, Martineau D, Ando D (2001) Comparison of serum interleukin-10 (il-10) levels between normal volunteers and patients with advanced melanoma. *Cancer Invest* 19(3):239–247.
53. Itakura E, et al. (June 2011) Il-10 expression by primary tumor cells correlates with melanoma progression from radial to vertical growth phase and development of metastatic competence. *Mod Pathol* 24(6):801–809.
54. Oliver JC, et al. (1993) Cytokine kinetics in an in vitro whole blood model following an endotoxin challenge. *Lymphokine Cytokine Res* 12(2):115–120.
55. Lo WC, Arsenescu V, Arsenescu RI, Friedman A (November 2016) Inflammatory bowel disease: How effective is tnf-alpha suppression? *PLoS One* 11(11):e0165782.
56. Siewe N, Yakubu AA, Satoskar AR, Friedman A (Jan 2017) Granuloma formation in leishmaniasis: A mathematical model. *J Theor Biol* 412:48–60.
57. Hao W, Schlesinger LS, Friedman A (March 17, 2016) Modeling granulomas in response to infection in the lung. *PLoS ONE* 11(3):e0148738.
58. Agata Y, et al. (1996) Expression of the pd-1 antigen on the surface of stimulated mouse t and b lymphocytes. *Int Immunol* 8(5):765–772.
59. Cheng X, et al. (2017) Human pd-1/b7-1/cd274 protein. *Sino Biological Inc*, <http://www.sinobiological.com/PD-L1-B7-H1-CD274-Protein-g-533.html>.
60. Linsley PS, et al. (1992) Coexpression and functional cooperation of ctla-4 and cd28 on activated t lymphocytes. *J Exp Med* 176(6):1595–1604.
61. Lai X, Friedman A (July 2017) Combination therapy of cancer with braf inhibitor and immune checkpoint inhibitor: A mathematical model. *BMC Syst Biol* 11(1):70.
62. Fellner C (2012) Ipilimumab (yervoy) prolongs survival in advanced melanoma. *P T* 37(9):503–511.
63. Trabucco SE, et al. (Jan 2015) Inhibition of bromodomain proteins for the treatment of human diffuse large b-cell lymphoma. *Clin Cancer Res* 21(1):113–122.
64. Moyer MW (Nov 2011) First drugs found to inhibit elusive cancer target. *Nat Med* 17(11):1325.
65. Marino S, Hogue I, Ray C, Kirschner D (2008) A methodology for performing global uncertainty and sensitivity analysis in systems biology. *J Theor Biol* 254(1):178–196.
66. Shi L, Chen S, Yang L, Li Y (Sep 2013) The role of pd-1 and pd-l1 in t-cell immune suppression in patients with hematological malignancies. *J Hematol Oncol* 6(74):doi: 10.1186/1756-8722-6-74.
67. Muppidi MR, George S (2015) Immune checkpoint inhibitors in renal cell carcinoma. *Journal of Targeted Therapies in Cancer* 2015 4:47–52.
68. Cooper ZA, et al. (July 2014) Response to braf inhibition in melanoma is enhanced when combined with immune checkpoint blockade. *Cancer Immunol Res* 2(7):643–654.
69. Hogg SJ, et al. (Feb 2017) Bet-bromodomain inhibitors engage the host immune system and regulate expression of the immune checkpoint ligand pd-l1. *Cell Rep* 18(9):2162–2174.
70. Munn DH, Mellor AL (March 2016) Ido in the tumor microenvironment: Inflammation, counter-regulation, and tolerance. *Trends in Immunology* 37(3):193–207.
71. Francisco LM, Sage PT, Sharpe AH (2010) The pd-1 pathway in tolerance and autoimmunity. *Immunol Rev* 236:219–242.
72. Zhu H, et al. (September 2017) Bet bromodomain inhibition promotes anti-tumor immunity by suppressing pd-l1 expression. *Cell Rep* 16(11):2829–2873.
73. Lowther DE, et al. (Apr 2016) Pd-1 marks dysfunctional regulatory t cells in malignant gliomas. *JCI Insight* 1(5):e85935.
74. Buttea MJ, Pena-Cruz V, Kima MJ, Freemanc GJ, Sharpe AH (Aug 2008) Interaction of human pd-l1 and b7-1. *Mol Immunol* 45(13):3567–3572.
75. Brahmer JR, et al. (Jun 2012) Safety and activity of anti-pd-l1 antibody in patients with advanced cancer. *N Engl J Med* 366(26):2455–2465.
76. Mertz JA, et al. (2011) Targeting myc dependence in cancer by inhibiting bet bromodomains. *Proc Natl Acad Sci U S A* 108(40):16669–16674.
77. Bian B, et al. (Apr 2017) Gene expression profiling of patient-derived pancreatic cancer xenografts predicts sensitivity to the bet bromodomain inhibitor jq1: implications for individu-

**Table S1. List of variables (in units of g/cm<sup>3</sup>).**

| Notation  | Description                                   | Notation   | Description                 |
|-----------|-----------------------------------------------|------------|-----------------------------|
| $D$       | density of DCs                                | $T_\alpha$ | TNF- $\alpha$ concentration |
| $T_1$     | density of activated CD4 <sup>+</sup> T cells | $N$        | NO concentration            |
| $T_8$     | density of activated CD8 <sup>+</sup> T cells | $W$        | Oxygen density              |
| $T_r$     | density of activated Treg cells               | $G$        | VEGF concentration          |
| $M_1$     | density of M1                                 | $M_C$      | M-CSF concentration         |
| $M_2$     | density of M2                                 | $M_P$      | MCP-1 concentration         |
| $E$       | density of Endothelial cells                  | $P$        | PD-1 concentration          |
| $C$       | density of cancer cells                       | $L$        | PD-L1 concentration         |
| $I_{12}$  | IL-12 concentration                           | $Q$        | PD-1-PD-L1 concentration    |
| $I_2$     | IL-2 concentration                            | $A$        | anti-PD-L1 concentration    |
| $T_\beta$ | TGF- $\beta$ concentration                    | $B$        | BET inhibitor concentration |
| $I_{10}$  | IL-10 concentration                           |            |                             |

alized medicine efforts. *EMBO Mol Med* 9(4):482–497.

78. D'Acunto B (2004) *Computational Methods for PDE in mechanics*. Series on Advances in Mathematics for Applied Sciences-Vol.67. (World Scientific, Singapore).
79. Kim Y, Lawler S, Nowicki MO, Chiocca EA, Friedman A (Oct 2009) A mathematical model for pattern formation of glioma cells outside the tumor spheroid core. *J Theor Biol* 260(3):359–371.
80. Kim Y, Wallace J, Li F, Ostrowski M, Friedman A (Sep 2010) Transformed epithelial cells and

fibroblasts/myofibroblasts interaction in breast tumor: a mathematical model and experiments. *J Theor Biol* 61(3):401–421.

81. Hao W, Friedman A (Nov 18, 2016) Mathematical model on alzheimer's disease. *BMC Syst Biol* 10(108):1–18.
82. Hao W, et al. (2017) A mathematical model of chronic pancreatitis. *Proc Natl Acad Sci U S A* 114(19):5011–5016.

DRAFT

**Table S2. Summary of parameter values**

| Notation                 | Description                                        | Value used                                          | References |
|--------------------------|----------------------------------------------------|-----------------------------------------------------|------------|
| $\delta_D$               | diffusion coefficient of DCs                       | $8.64 \times 10^{-7} \text{ cm}^2 \text{ day}^{-1}$ | (43)       |
| $\delta_T$               | diffusion coefficient of T cells                   | $8.64 \times 10^{-7} \text{ cm}^2 \text{ day}^{-1}$ | (43)       |
| $\delta_M$               | diffusion coefficient of macrophages               | $8.64 \times 10^{-7} \text{ cm}^2 \text{ day}^{-1}$ | (43)       |
| $\delta_E$               | diffusion coefficient of endothelial cells         | $8.64 \times 10^{-7} \text{ cm}^2 \text{ day}^{-1}$ | (43)       |
| $\delta_C$               | diffusion coefficient of tumor cells               | $8.64 \times 10^{-7} \text{ cm}^2 \text{ day}^{-1}$ | (43)       |
| $\delta_{I_{12}}$        | diffusion coefficient of IL-12                     | $6.05 \times 10^{-2} \text{ cm}^2 \text{ day}^{-1}$ | estimated  |
| $\delta_{I_2}$           | diffusion coefficient of IL-2                      | $9.58 \times 10^{-2} \text{ cm}^2 \text{ day}^{-1}$ | estimated  |
| $\delta_{T_\beta}$       | diffusion coefficient of TGF- $\beta$              | $8.52 \times 10^{-2} \text{ cm}^2 \text{ day}^{-1}$ | estimated  |
| $\delta_{I_{10}}$        | diffusion coefficient of IL-10                     | $9.11 \times 10^{-2} \text{ cm}^2 \text{ day}^{-1}$ | estimated  |
| $\delta_{T_\alpha}$      | diffusion coefficient of TNF- $\alpha$             | $8.46 \times 10^{-2} \text{ cm}^2 \text{ day}^{-1}$ | estimated  |
| $\delta_W$               | diffusion coefficient of oxygen                    | $1.728 \text{ cm}^2 \text{ day}^{-1}$               | (46)       |
| $\delta_N$               | diffusion coefficient of NO                        | $1.728 \text{ cm}^2 \text{ day}^{-1}$               | (46)       |
| $\delta_G$               | diffusion coefficient of VEGF                      | $8.64 \times 10^{-2} \text{ cm}^2 \text{ day}^{-1}$ | (28)       |
| $\delta_{M_C}$           | diffusion coefficient of M-CSF                     | $6.36 \times 10^{-2} \text{ cm}^2 \text{ day}^{-1}$ | estimated  |
| $\delta_{M_P}$           | diffusion coefficient of MCP-1                     | $1.12 \times 10^{-1} \text{ cm}^2 \text{ day}^{-1}$ | estimated  |
| $\delta_A$               | diffusion coefficient of anti-PD-L1                | $4.73 \times 10^{-2} \text{ cm}^2 \text{ day}^{-1}$ | estimated  |
| $\delta_B$               | diffusion coefficient of BETi                      | $3.24 \times 10^{-1} \text{ cm}^2 \text{ day}^{-1}$ | estimated  |
| $\sigma_0$               | flux rate of $T_1$ and $T_8$ cells at the boundary | $1 \text{ cm}^{-1}$                                 | (43)       |
| $\chi_M$                 | chemoattraction coefficient of MCP-1               | $10 \text{ cm}^5/\text{g} \cdot \text{day}$         | (79, 80)   |
| $\chi_G$                 | chemoattraction coefficient of VEGF                | $10 \text{ cm}^5/\text{g} \cdot \text{day}$         | (79, 80)   |
| $\lambda_{DC}$           | activation rate of DCs by tumor cells              | $7.4 \text{ g}/\text{cm}^3 \cdot \text{day}$        | estimated  |
| $\lambda_{T_1 I_{12}}$   | activation rate of $CD4^+$ T cells by IL-12        | $27.96 \text{ day}^{-1}$                            | estimated  |
| $\lambda_{T_1 I_2}$      | activation rate of $CD4^+$ T cells by IL-2         | $0.25 \text{ day}^{-1}$                             | (43)       |
| $\lambda_{T_8 I_{12}}$   | activation rate of $CD8^+$ T cells by IL-12        | $24.90 \text{ day}^{-1}$                            | estimated  |
| $\lambda_{T_8 I_2}$      | activation rate of $CD8^+$ T cells by IL-2         | $0.25 \text{ day}^{-1}$                             | (43)       |
| $\lambda_{T_r T_\beta}$  | activation rate of Tregs by TGF- $\beta$           | $1.5 \text{ day}^{-1}$                              | estimated  |
| $\lambda_{M_1}$          | activation rate of M1 macrophages                  | $1.35 \text{ day}^{-1}$                             | estimated  |
| $\lambda_{M_2}$          | activation rate of M2 macrophages                  | $1.01 \text{ day}^{-1}$                             | estimated  |
| $\beta_{M_1}$            | phenotype change rate of M1 to M2 macrophages      | $0.15 \text{ day}^{-1}$                             | estimated  |
| $\beta_{M_2}$            | phenotype change rate of M2 to M1 macrophages      | $2.34 \times 10^{-3} \text{ day}^{-1}$              | estimated  |
| $\lambda_E$              | activation rate of endothelial cells               | $2.38 \times 10^7 \text{ day}^{-1}$                 | estimated  |
| $\lambda_C$              | growth rate of cancer cells                        | $1.92 \text{ day}^{-1}$                             | estimated  |
| $\lambda_{I_{12} D}$     | production rate of IL-12 by DCs                    | $1.38 \times 10^{-6} \text{ day}^{-1}$              | estimated  |
| $\lambda_{I_{12} M_1}$   | production rate of IL-12 by M1 macrophages         | $5.52 \times 10^{-6} \text{ day}^{-1}$              | estimated  |
| $\lambda_{I_2 T_1}$      | production rate of IL-2 by $CD4^+$ T cells         | $2.82 \times 10^{-8} \text{ day}^{-1}$              | (43)       |
| $\lambda_{T_\beta C}$    | production rate of TGF- $\beta$ by cancer cells    | $5.39 \times 10^{-11} \text{ day}^{-1}$             | estimated  |
| $\lambda_{T_\beta T_r}$  | production rate of TGF- $\beta$ by Tregs           | $2.16 \times 10^{-7} \text{ day}^{-1}$              | (55)       |
| $\lambda_{T_\beta M_2}$  | production rate of TGF- $\beta$ by M2 macrophages  | $1.35 \times 10^{-9} \text{ day}^{-1}$              | estimated  |
| $\lambda_{I_{10} C}$     | production rate of IL-10 by cancer cells           | $2.07 \times 10^{-8} \text{ day}^{-1}$              | estimated  |
| $\lambda_{I_{10} M_2}$   | production rate of IL-10 by M2 macrophages         | $1.65 \times 10^{-9} \text{ day}^{-1}$              | estimated  |
| $\lambda_{T_\alpha M_1}$ | production rate of TNF- $\alpha$ by M1 macrophages | $1.36 \times 10^{-5} \text{ day}^{-1}$              | estimated  |
| $\lambda_{T_\alpha T_1}$ | production rate of TNF- $\alpha$ by Th1 cells      | $1.36 \times 10^{-7} \text{ day}^{-1}$              | estimated  |
| $\lambda_{N M_2}$        | production rate of NO by M2 macrophages            | 0.12/day                                            | estimated  |
| $\lambda_{WE}$           | production rate of oxygen by endothelial cells     | $7 \times 10^{-2}/\text{day}$                       | (25)       |
| $\lambda_{GC}$           | production rate of VEGF by cancer cells            | $2 \times 10^{-6} \text{ day}^{-1}$                 | (25)       |
| $\lambda_{GM_2}$         | production rate of VEGF by M2 macrophages          | $2.5 \times 10^{-5} \text{ day}^{-1}$               | estimated  |
| $\lambda_{M_C C}$        | production rate of M-CSF by cancer cells           | $1.2 \times 10^{-8} \text{ day}^{-1}$               | estimated  |
| $\lambda_{M_P M_2}$      | production rate of MCP-1 by M2 macrophages         | $1.2 \times 10^{-8} \text{ day}^{-1}$               | estimated  |
| $\lambda_{M_P C}$        | production rate of MCP-1 by cancer cells           | $8.24 \times 10^{-7} \text{ day}^{-1}$              | estimated  |

**Table S3. Summary of parameter values**

| Notation         | Description                                         | Value used                                     | References |
|------------------|-----------------------------------------------------|------------------------------------------------|------------|
| $d_D$            | death rate of DCs                                   | $0.1 \text{ day}^{-1}$                         | (43)       |
| $d_{T_1}$        | death rate of $CD4^+$ T cells                       | $0.197 \text{ day}^{-1}$                       | (43)       |
| $d_{T_8}$        | death rate of $CD8^+$ T cells                       | $0.18 \text{ day}^{-1}$                        | (43)       |
| $d_{T_r}$        | death rate of Tregs                                 | $0.2 \text{ day}^{-1}$                         | (55)       |
| $d_{M_1}$        | death rate of M1 macrophage                         | $0.015 \text{ day}^{-1}$                       | (81)       |
| $d_{M_2}$        | death rate of M2 macrophage                         | $0.015 \text{ day}^{-1}$                       | (81)       |
| $d_E$            | death rate of endothelial cells                     | $0.69 \text{ day}^{-1}$                        | (43)       |
| $d_C$            | death rate of tumor cells                           | $0.17 \text{ day}^{-1}$                        | (43)       |
| $d_{I_{12}}$     | degradation rate of IL-12                           | $1.38 \text{ day}^{-1}$                        | (43)       |
| $d_{I_2}$        | degradation rate of IL-2                            | $2.376 \text{ day}^{-1}$                       | (43)       |
| $d_{T_\beta}$    | degradation rate of TGF- $\beta$                    | $499.066 \text{ day}^{-1}$                     | estimated  |
| $d_{I_{10}}$     | degradation rate of IL-10                           | $8.3178 \text{ day}^{-1}$                      | estimated  |
| $d_{T_\alpha}$   | degradation rate of TGF- $\alpha$                   | $55.01 \text{ day}^{-1}$                       | estimated  |
| $d_N$            | degradation rate of NO                              | $198 \text{ day}^{-1}$                         | (56)       |
| $d_W$            | take-up rate of oxygen by cells                     | $3.76 \times 10^{-1} \text{ day}^{-1}$         | (25)       |
| $d_G$            | degradation rate of VEGF                            | $12.6 \text{ day}^{-1}$                        | (25)       |
| $d_{M_C}$        | degradation rate of M-CSF                           | $4.8/\text{day}$                               | (25)       |
| $d_{M_P}$        | degradation rate of MCP-1                           | $55.01 \text{ day}^{-1}$                       | (25)       |
| $d_A$            | degradation rate of anti-PD-L1                      | $0.047 \text{ day}^{-1}$                       | estimated  |
| $d_B$            | degradation rate of BETi                            | $13.86 \text{ day}^{-1}$                       | estimated  |
| $K_D$            | half-saturation of $CD4^+$ T cells                  | $4 \times 10^{-4} \text{ g/cm}^3$              | estimated  |
| $K_{T_1}$        | half-saturation of $CD4^+$ T cells                  | $2 \times 10^{-3} \text{ g/cm}^3$              | estimated  |
| $K_{T_8}$        | half-saturation of $CD8^+$ T cells                  | $1 \times 10^{-3} \text{ g/cm}^3$              | estimated  |
| $K_{T_r}$        | half-saturation of Tregs                            | $5 \times 10^{-4} \text{ g/cm}^3$              | (43)       |
| $K_{M_1}$        | half-saturation of M1 macrophages                   | $10^{-4} \text{ g/cm}^3$                       | estimated  |
| $K_{M_2}$        | half-saturation of M2 macrophages                   | $3.2 \times 10^{-3} \text{ g/cm}^3$            | estimated  |
| $K_E$            | half-saturation of endothelial cells                | $2.5 \times 10^{-3} \text{ g/cm}^3$            | (25)       |
| $K_C$            | half-saturation of tumor cells                      | $0.4 \text{ g/cm}^3$                           | (43)       |
| $K_{I_{12}}$     | half-saturation of IL-12                            | $8 \times 10^{-10} \text{ g/cm}^3$             | estimated  |
| $K_{I_2}$        | half-saturation of IL-2                             | $2.37 \times 10^{-11} \text{ g/cm}^3$          | (43)       |
| $K_{T_\beta}$    | half-saturation of TGF- $\beta$                     | $2.68 \times 10^{-13} \text{ g/cm}^3$          | estimated  |
| $K_{I_{10}}$     | half-saturation of IL-10                            | $8.75 \times 10^{-11} \text{ g/cm}^3$          | estimated  |
| $K_{T_\alpha}$   | half-saturation of $\alpha$                         | $3 \times 10^{-11} \text{ g/cm}^3$             | (82)       |
| $K_N$            | half-saturation of NO                               | $2 \times 10^{-6} \text{ g/cm}^3$              | (56)       |
| $K_W$            | half-saturation of oxygen                           | $4.65 \times 10^{-4} \text{ g/cm}^3$           | (25)       |
| $K_G$            | half-saturation of VEGF                             | $7 \times 10^{-8} \text{ g/cm}^3$              | (25)       |
| $K_{M_C}$        | half-saturation of M-CSF                            | $10^{-9} \text{ g/cm}^3$                       | (25)       |
| $K_{M_P}$        | half-saturation of MCP-1                            | $2 \times 10^{-7} \text{ g/cm}^3$              | (25)       |
| $K_B$            | half-saturation of BETi                             | $8.02 \times 10^{-11} \text{ g/cm}^3$          | estimated  |
| $K_{T_{I_{10}}}$ | inhibition of function of T cells by IL-10          | $4.375 \times 10^{-11} \text{ g/cm}^3$         | estimated  |
| $K_{T_{T_r}}$    | inhibition of function of T cells by Tregs          | $2,5 \times 10^{-4} \text{ g/cm}^3$            | estimated  |
| $K_{T_N}$        | inhibition of function of T cells by NO             | $2 \times 10^{-6} \text{ g/cm}^3$              | estimated  |
| $K'_{TQ}$        | inhibition of function of T cells by PD-1-PD-L1     | $4.86 \times 10^{-20} \text{ g}^2/\text{cm}^6$ | estimated  |
| $K_{CB}$         | inhibition of proliferation of cancer cells by BETi | $8.02 \times 10^{-10} \text{ g/cm}^3$          | estimated  |
| $K_{T_\alpha B}$ | inhibition of production of TNF- $\alpha$ by BETi   | $8.02 \times 10^{-10} \text{ g/cm}^3$          | estimated  |
| $K_{GB}$         | inhibition of production of VEGF by BETi            | $8.02 \times 10^{-10} \text{ g/cm}^3$          | estimated  |
| $K_{T_r B}$      | inhibition of Tregs by BETi                         | $8.02 \times 10^{-10} \text{ g/cm}^3$          | estimated  |

**Table S4. Summary of parameter values**

| Notation        | Description                                    | Value used                                                | References |
|-----------------|------------------------------------------------|-----------------------------------------------------------|------------|
| $D_0$           | density of inactive DCs                        | $2 \times 10^{-5} \text{ g/cm}^3$                         | (43)       |
| $T_{10}$        | density of naive $CD4^+$ T cells in tumor      | $4 \times 10^{-4} \text{ g/cm}^3$                         | estimated  |
| $T_{80}$        | density of naive $CD8^+$ T cells in tumor      | $2 \times 10^{-4} \text{ g/cm}^3$                         | estimated  |
| $M_{10}$        | density of monocytes                           | $1.2 \times 10^{-4} \text{ g/cm}^3$                       | estimated  |
| $M_{20}$        | density of monocytes                           | $3.84 \times 10^{-3} \text{ g/cm}^3$                      | estimated  |
| $C_M$           | carrying capacity of cancer cells              | $0.8 \text{ g/cm}^3$                                      | (43)       |
| $\hat{T}_1$     | density of $CD4^+$ T cells from lymph node     | $4 \times 10^{-3} \text{ g/cm}^3$                         | estimated  |
| $\hat{T}_8$     | density of $CD8^+$ T cells from lymph node     | $2 \times 10^{-3} \text{ g/cm}^3$                         | estimated  |
| $\hat{T}_r$     | density of $CD8^+$ T cells from lymph node     | $1 \times 10^{-3} \text{ g/cm}^3$                         | estimated  |
| $E_M$           | carrying capacity of endothelial cells         | $5 \times 10^{-3} \text{ g/cm}^3$                         | (25)       |
| $G_0$           | threshold of VEGF concentration                | $3.65 \times 10^{-10} \text{ g/cm}^3$                     | (25)       |
| $W_G$           | threshold of oxygen density                    | $10^{-4} \text{ g/cm}^3$                                  | (25)       |
| $\eta_1$        | killing rate of tumor cells by $CD4^+$ T cells | $65.71 \text{ cm}^3/\text{g} \cdot \text{day}$            | estimated  |
| $\eta_8$        | killing rate of tumor cells by $CD8^+$ T cells | $328.55 \text{ cm}^3/\text{g} \cdot \text{day}$           | estimated  |
| $\mu_{LA}$      | blocking rate of PD-L1 by anti-PD-1            | $1.09 \times 10^6 \text{ cm}^3/\text{g} \cdot \text{day}$ | estimated  |
| $\mu_{BC}$      | absorbion rate of BETi by cancer cells         | $6.17 \times 10^{-9} \text{ day}^{-1}$                    | estimated  |
| $\mu_{BM_1}$    | absorbion rate of BETi by M1 macrophages       | $6.17 \times 10^{-9} \text{ day}^{-1}$                    | estimated  |
| $\rho_P$        | expression of PD-1 in T cells                  | $2.49 \times 10^{-7}$                                     | estimated  |
| $\rho_L$        | expression of PD-L1 in T cells                 | $3.25 \times 10^{-7}$                                     | estimated  |
| $\varepsilon_B$ | Promotion of effector T cells by BETi          | $2 \times 10^{10} \text{ cm}^3/\text{g}$                  | estimated  |
